# Supplementary material for: Synthesis and Biological Evaluation of Novel 10-Substituted-7-ethyl-10-hydroxycamptothecin (SN-38) Prodrugs
Source: MDPI journal article supplement (doi:10.3390/molecules191219718), 2014-11-27

# Supplementary Materials

Figure S1.  $^1\text{H}$ -NMR spectra of **4a**.

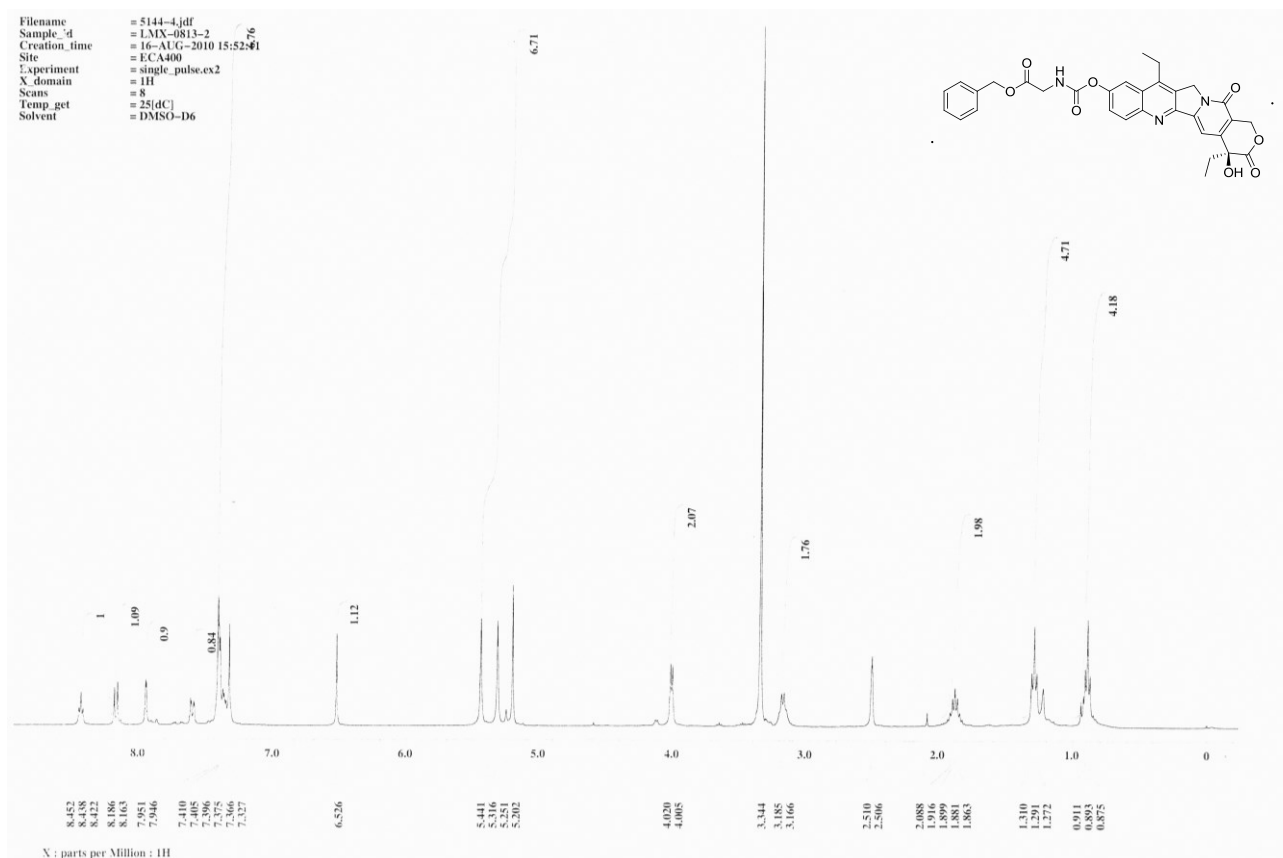

Figure S2. MS spectra of **4a**.

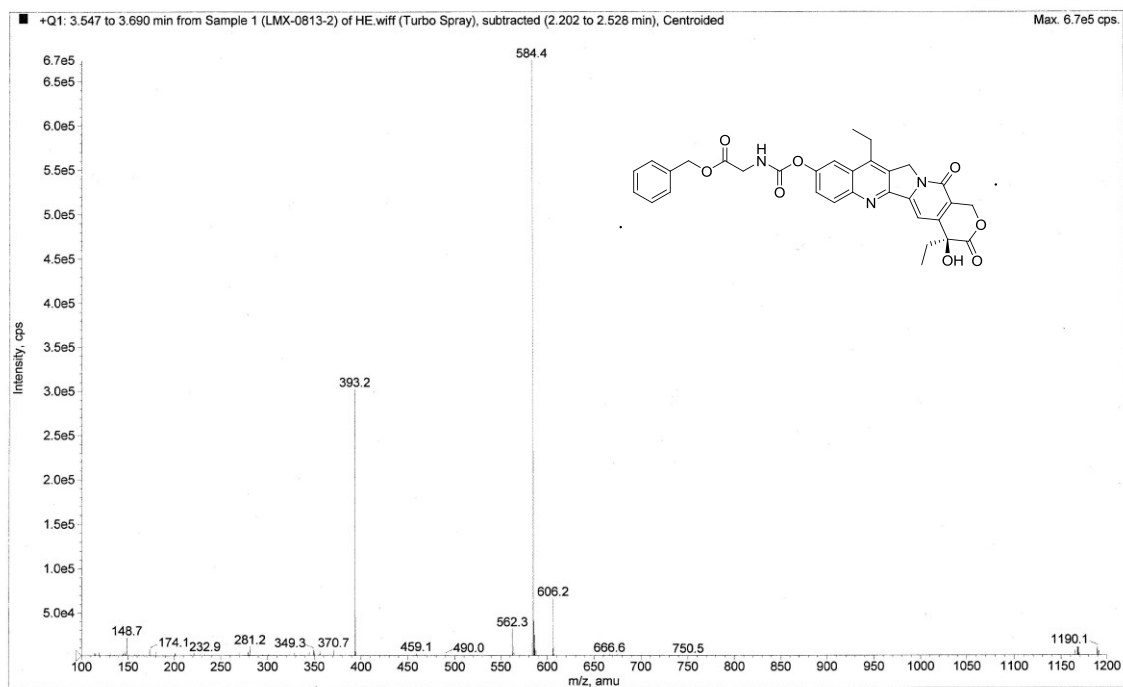

Figure S3.  $^1\text{H}$ -NMR spectra of **5a**.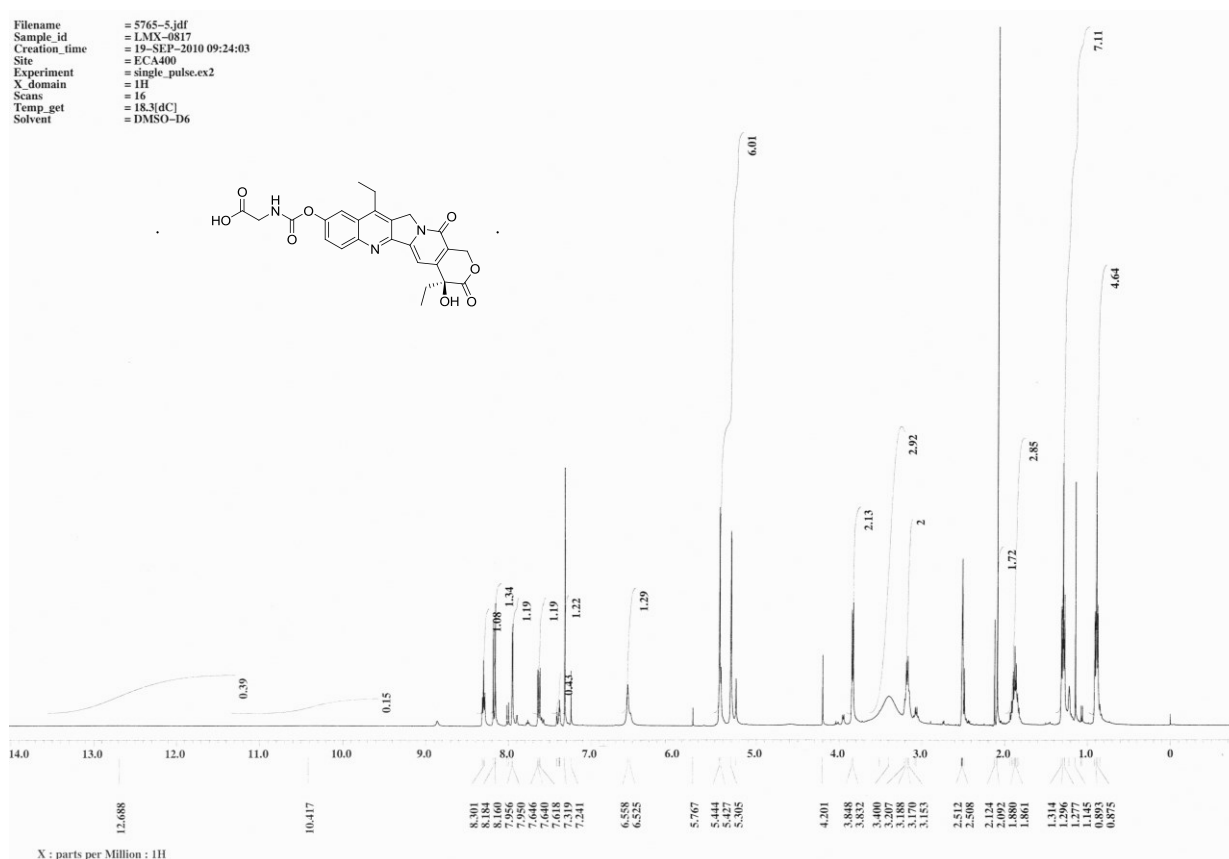Figure S4. MS spectra of **5a**.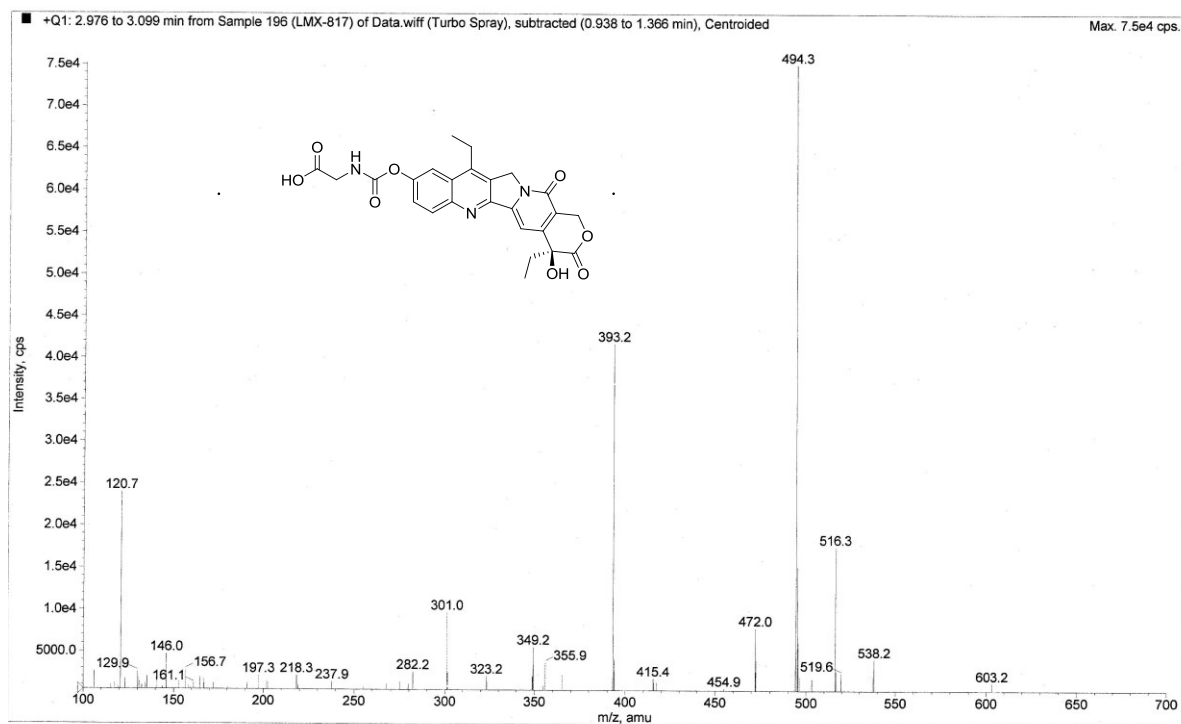

Figure S5.  $^1\text{H}$ -NMR spectra of **4b**.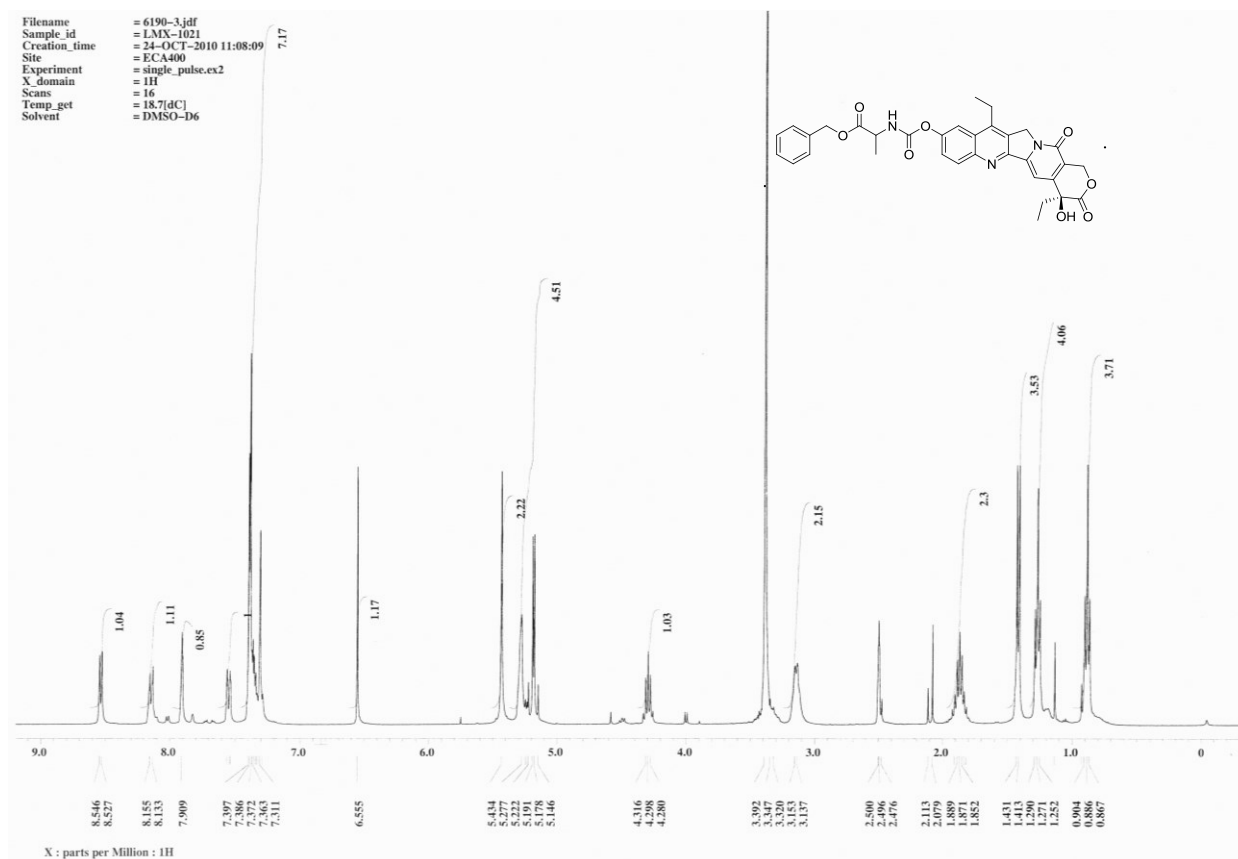Figure S6. MS spectra of **4b**.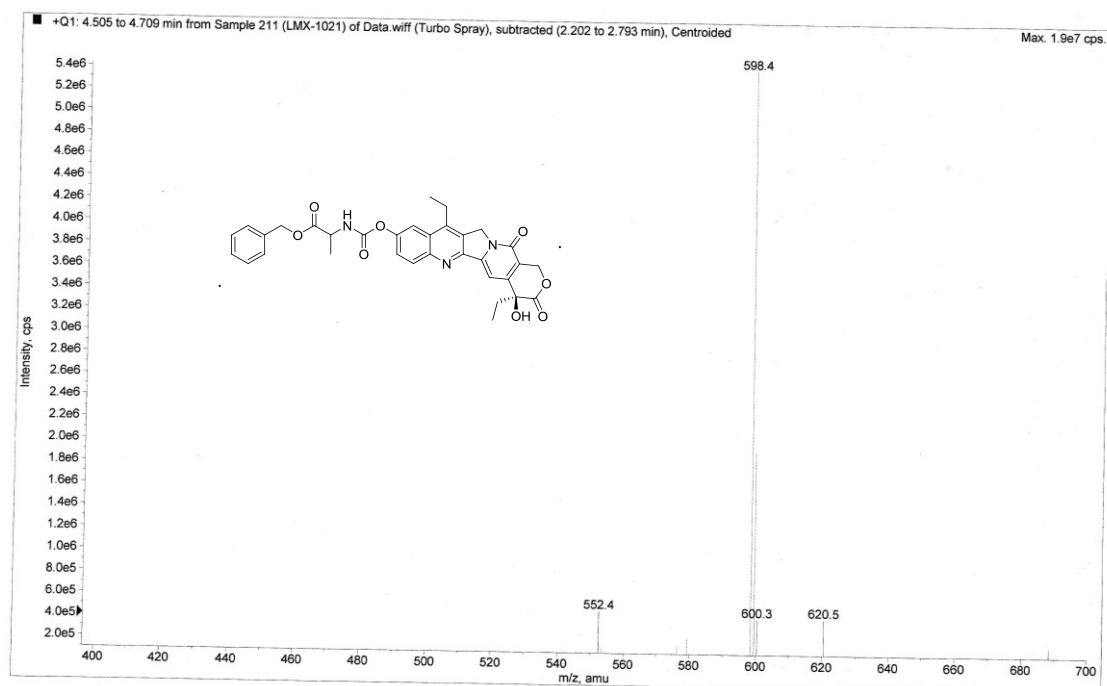

Figure S7.  $^1\text{H}$ -NMR spectra of **5b**.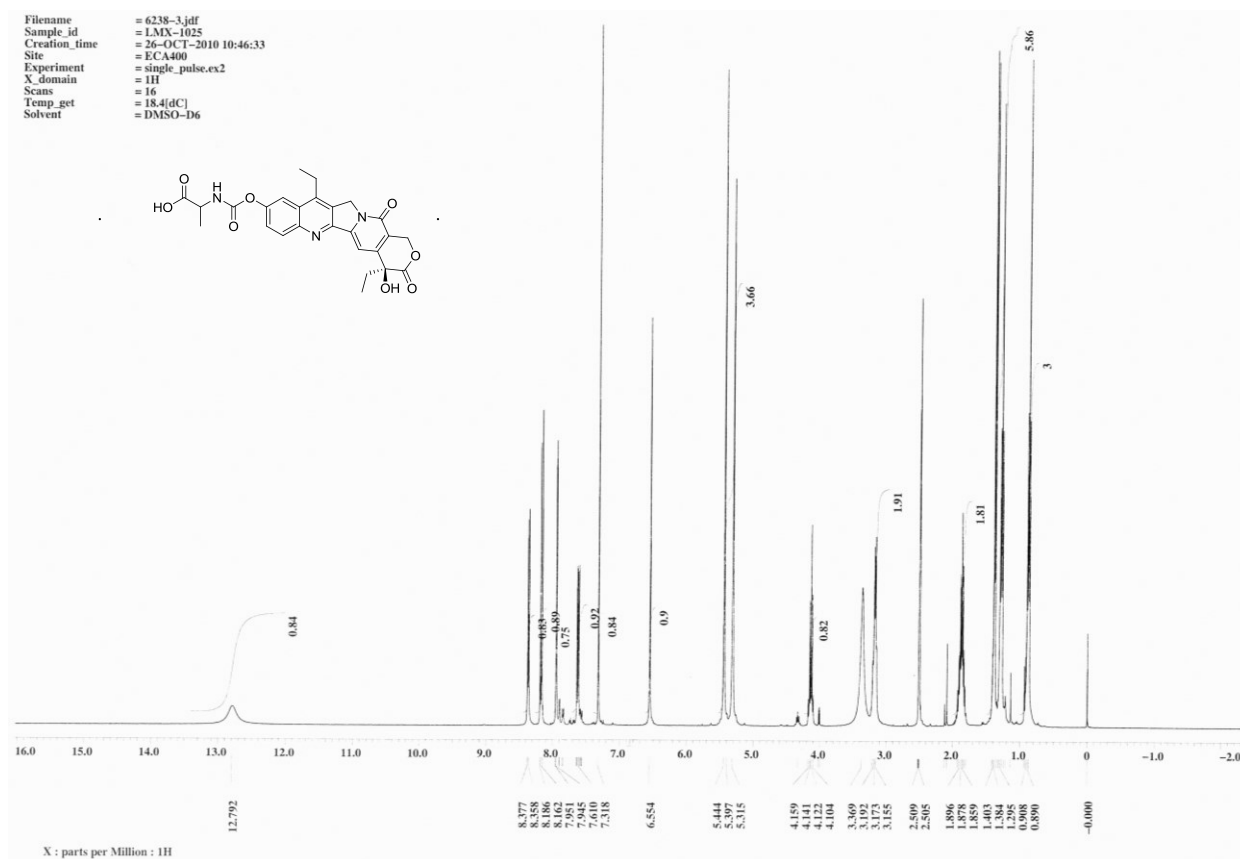Figure S8. MS spectra of **5b**.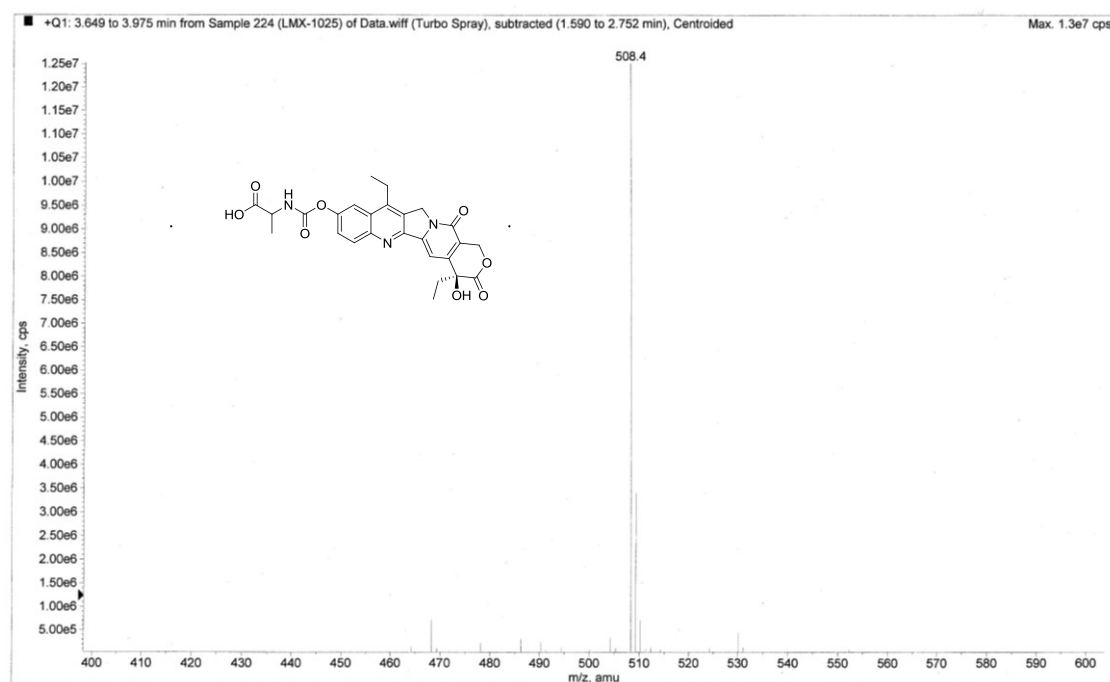

Figure S9.  $^1\text{H}$ -NMR spectra of 4c.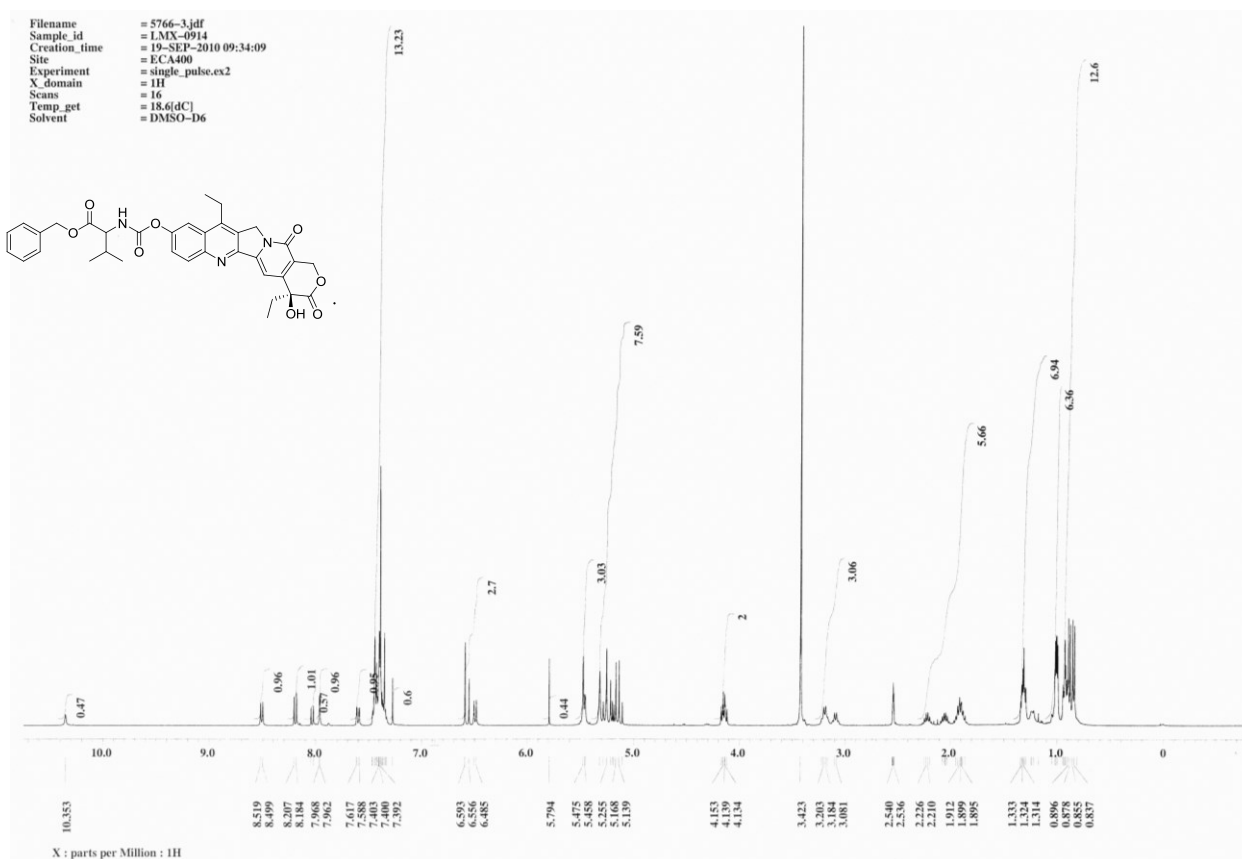

Figure S10. MS spectra of 4c.

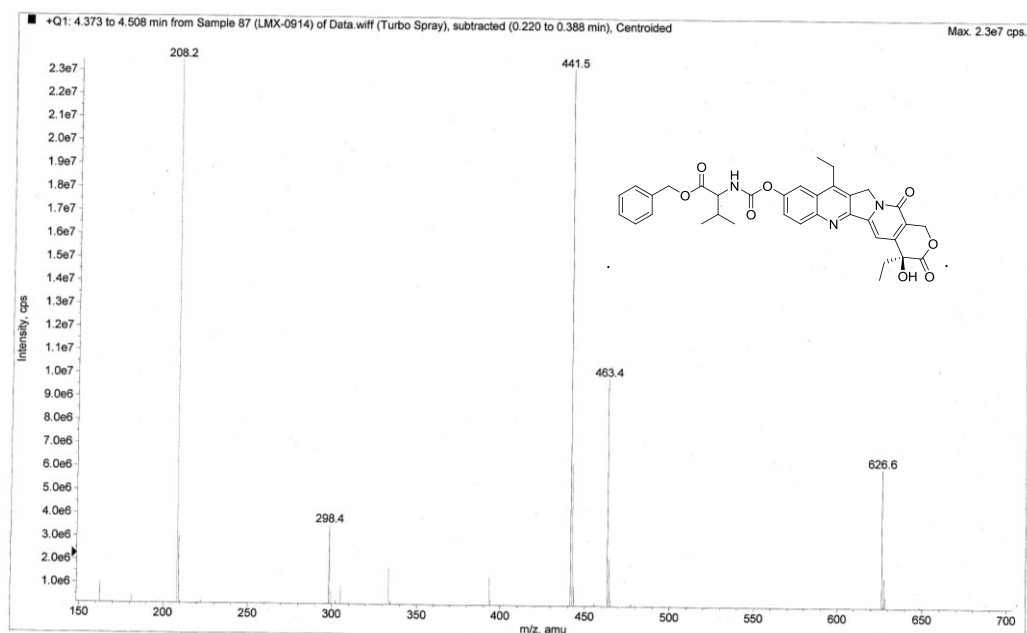

Figure S11.  $^1\text{H}$ -NMR spectra of **5c**.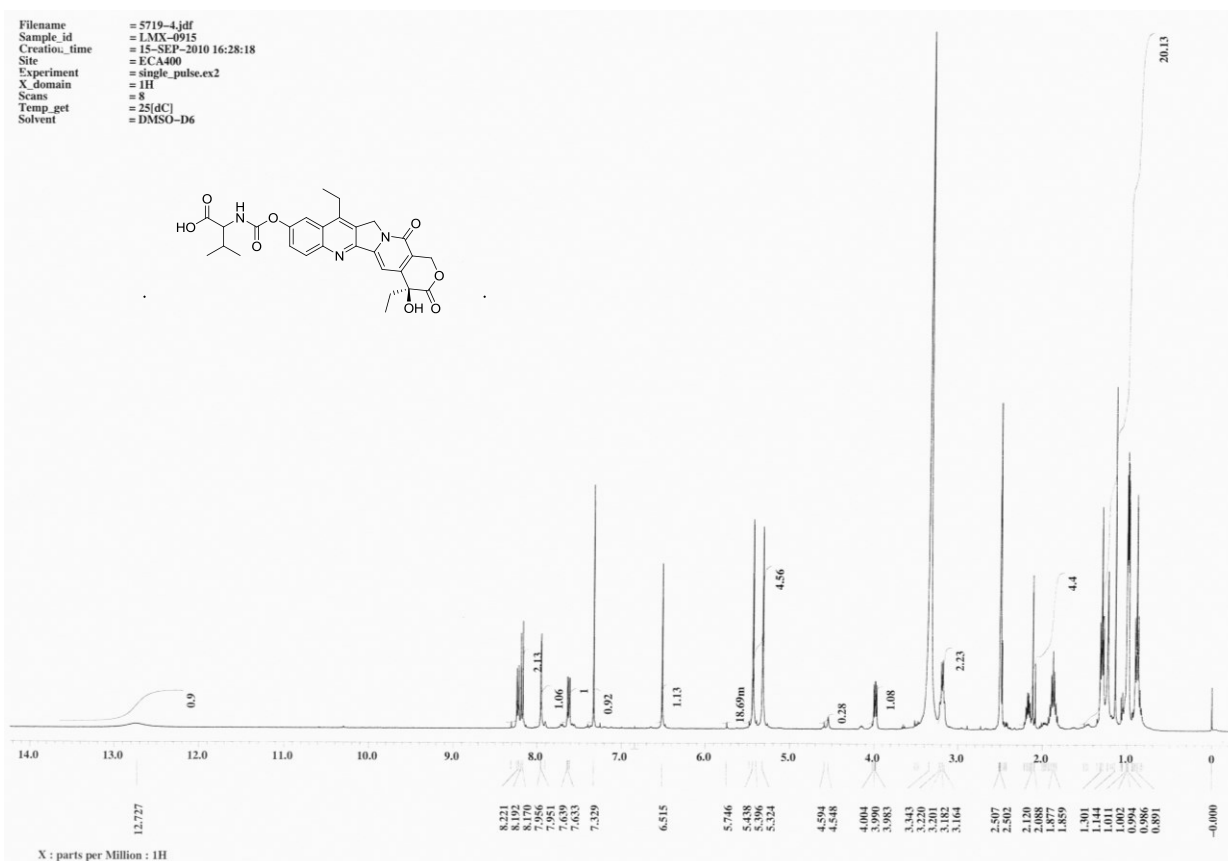Figure S12. MS spectra of **5c**.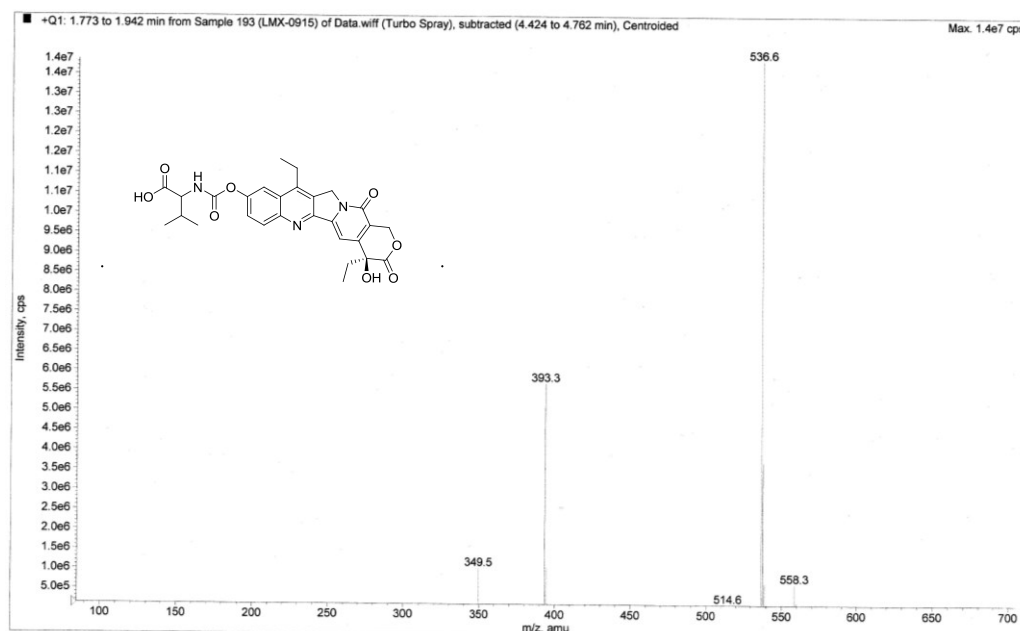

Figure S13.  $^1\text{H}$ -NMR spectra of **4d**.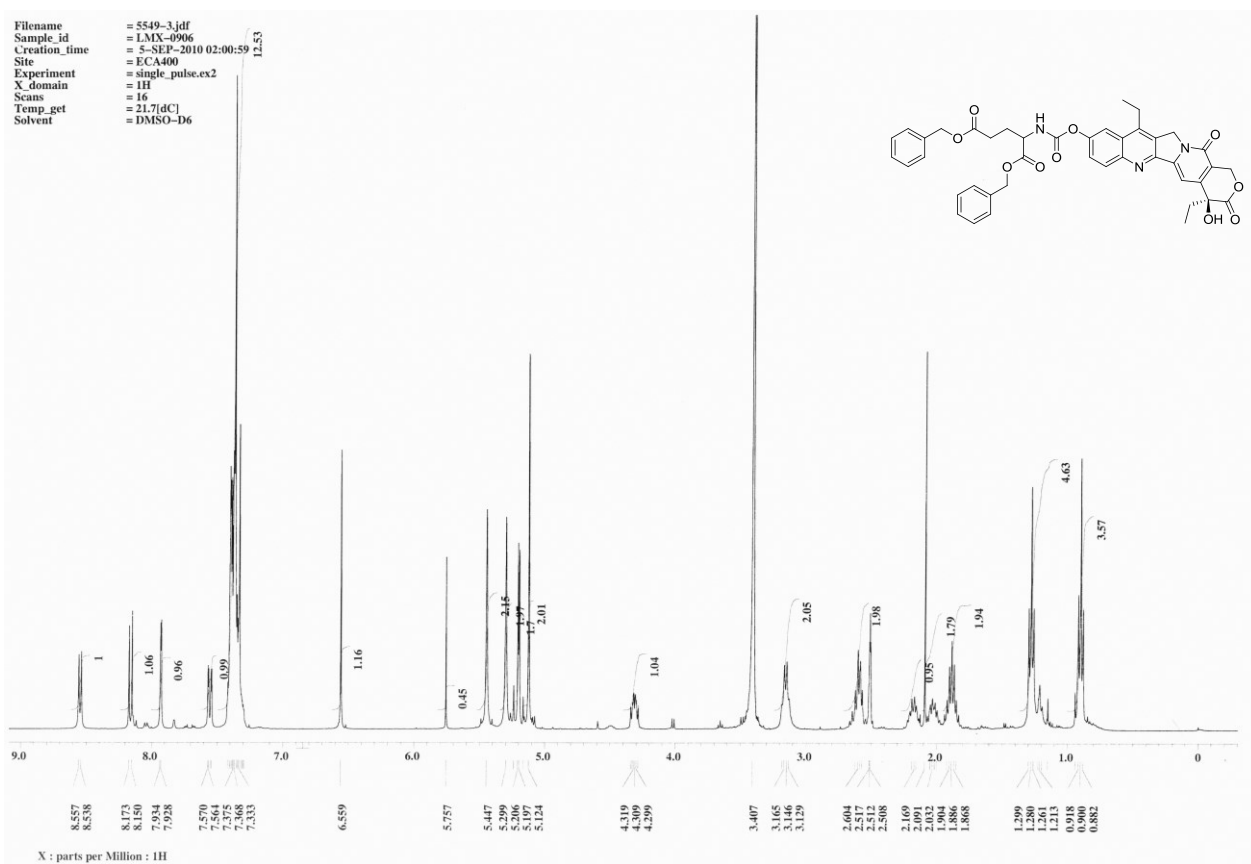Figure S14. MS spectra of **4d**.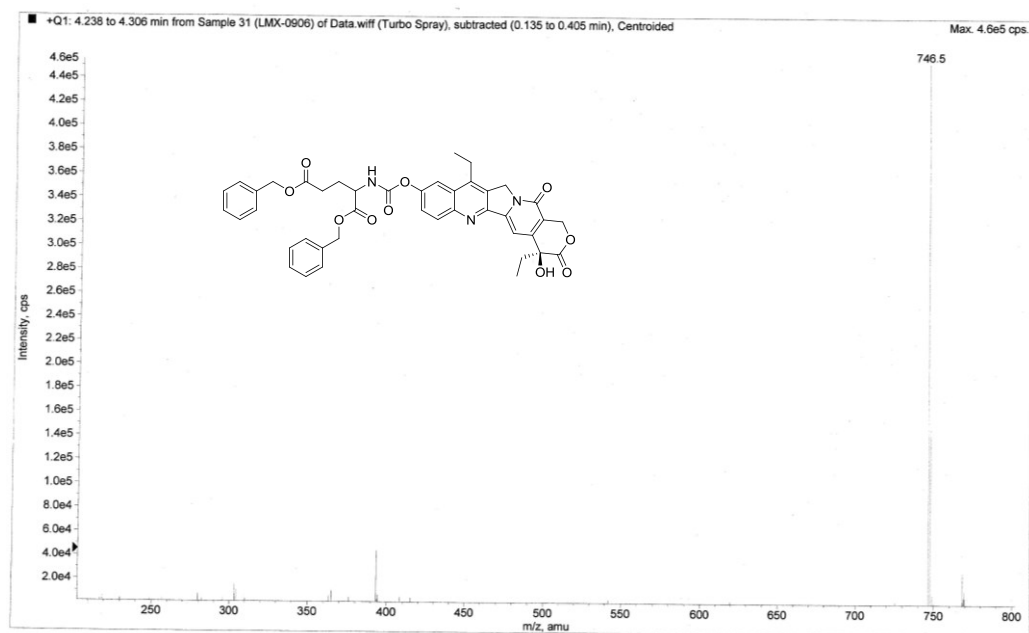

Figure S15.  $^1\text{H}$ -NMR spectra of **5d**.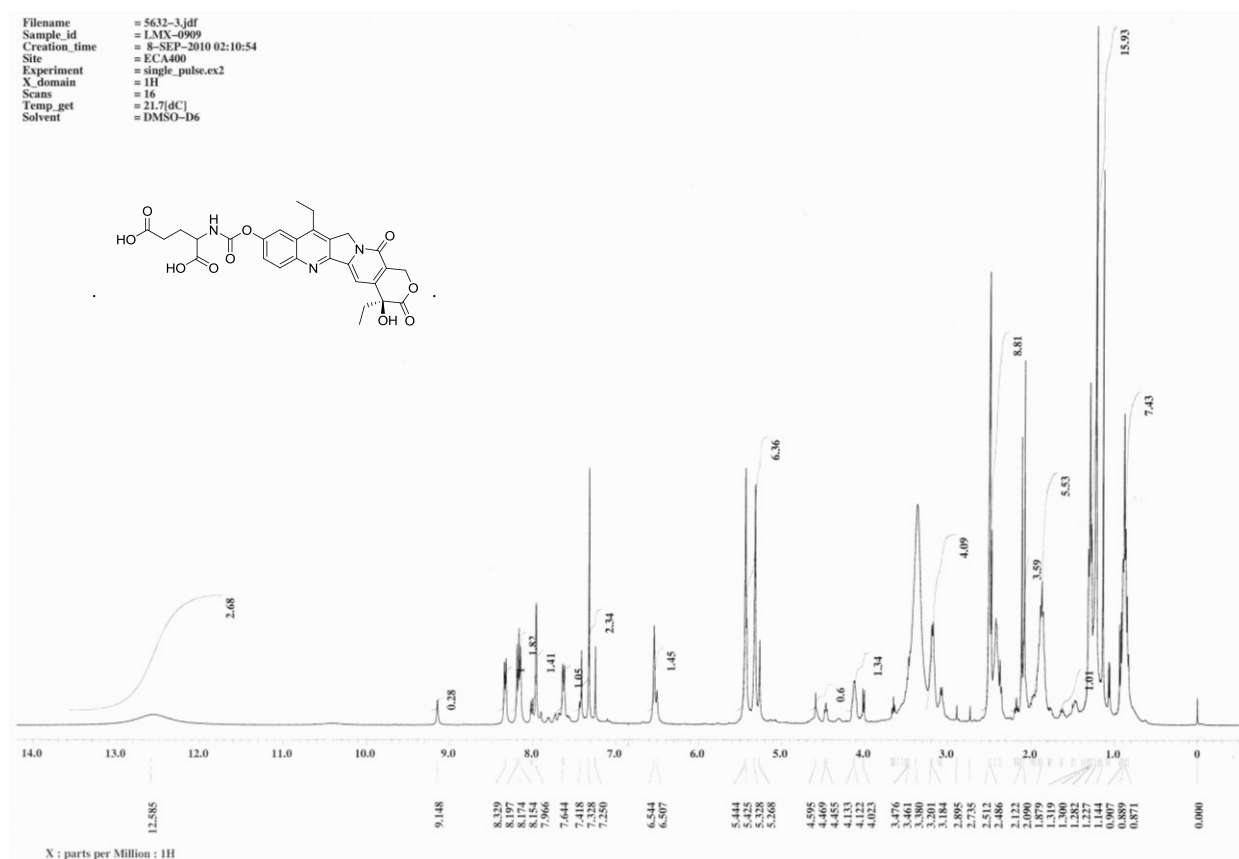Figure S16. MS spectra of **5d**.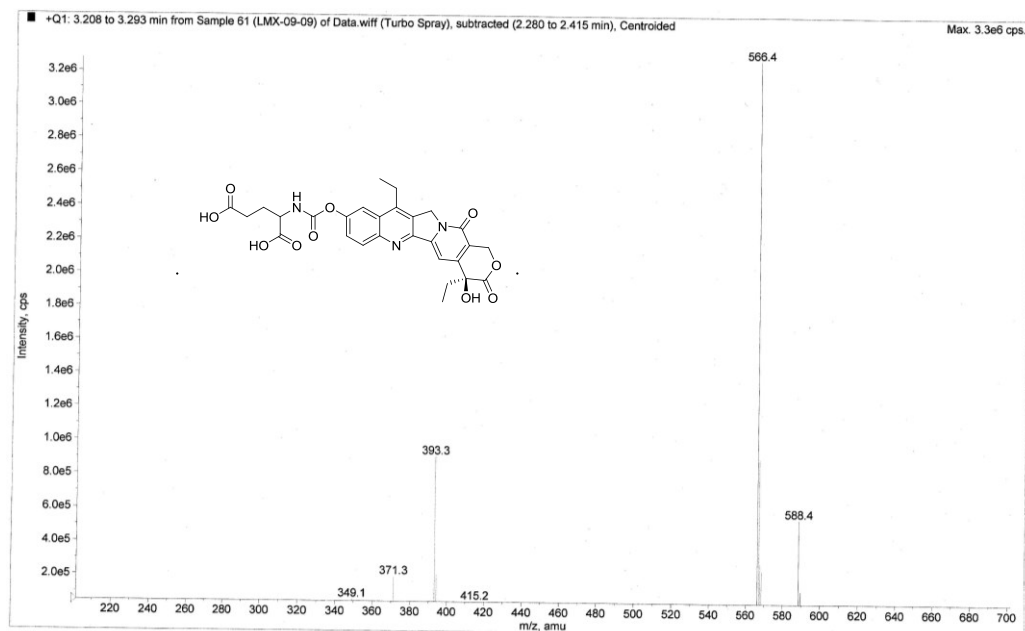



Figure S17.  $^1\text{H}$ -NMR spectra of 4e.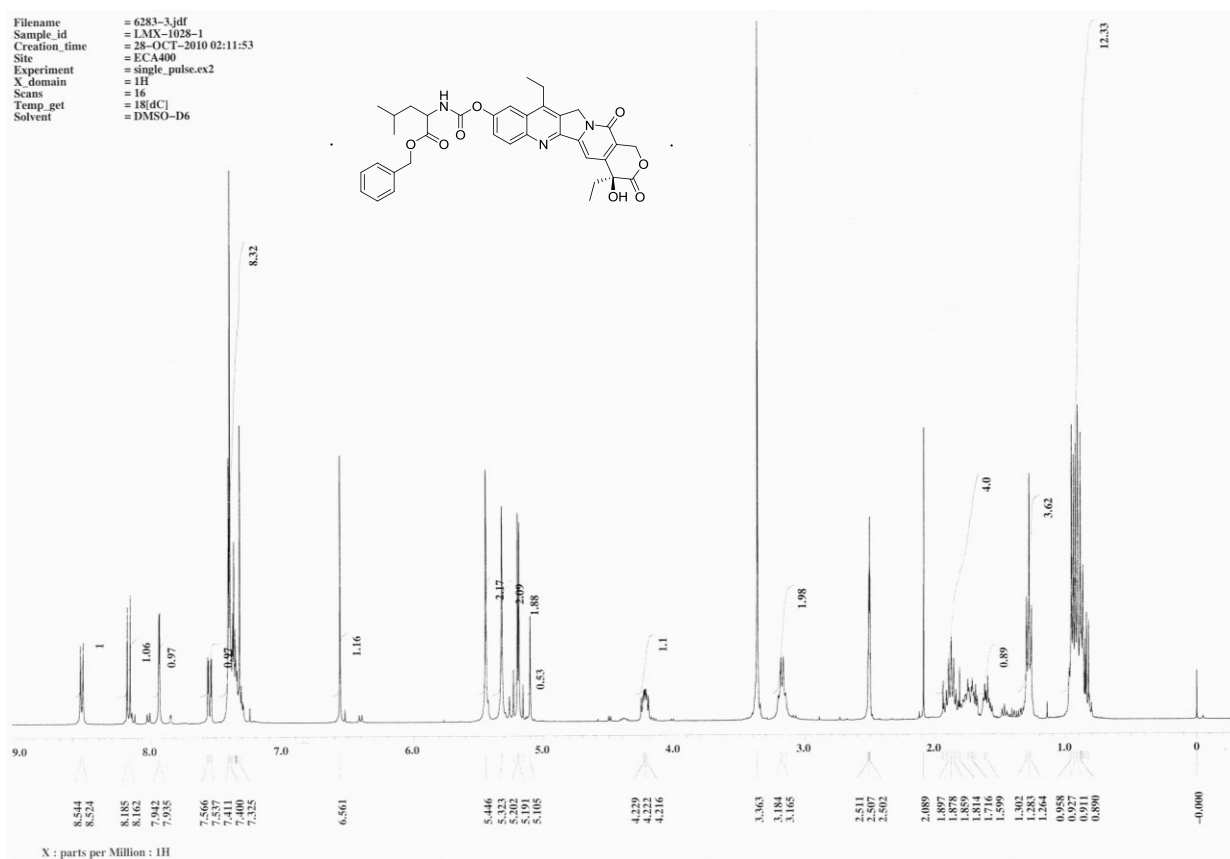

Figure S18. MS spectra of 4e.

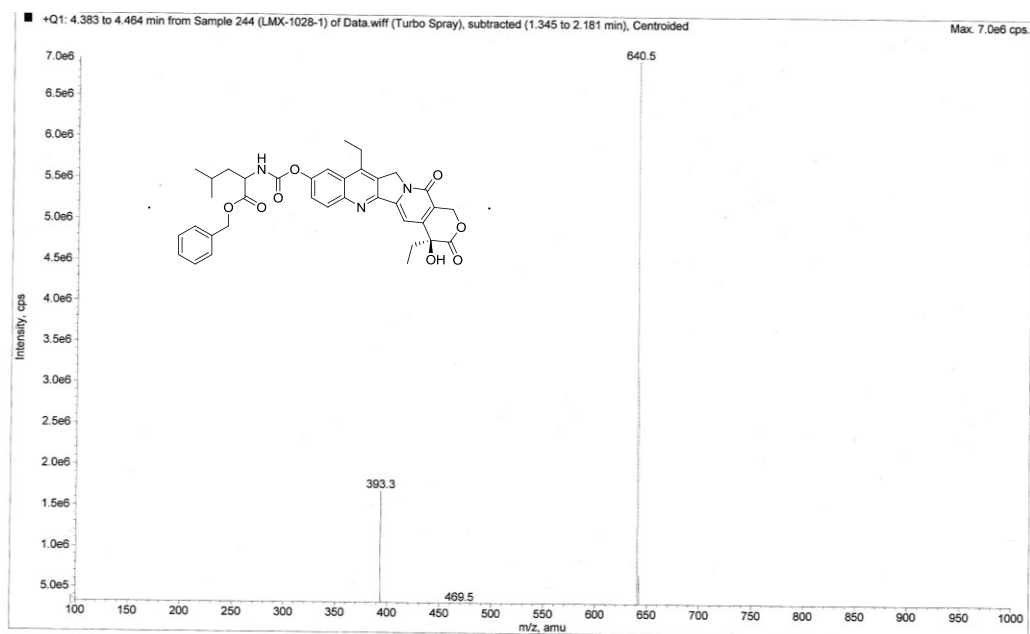

Figure S19.  $^1\text{H}$ -NMR spectra of **5e**.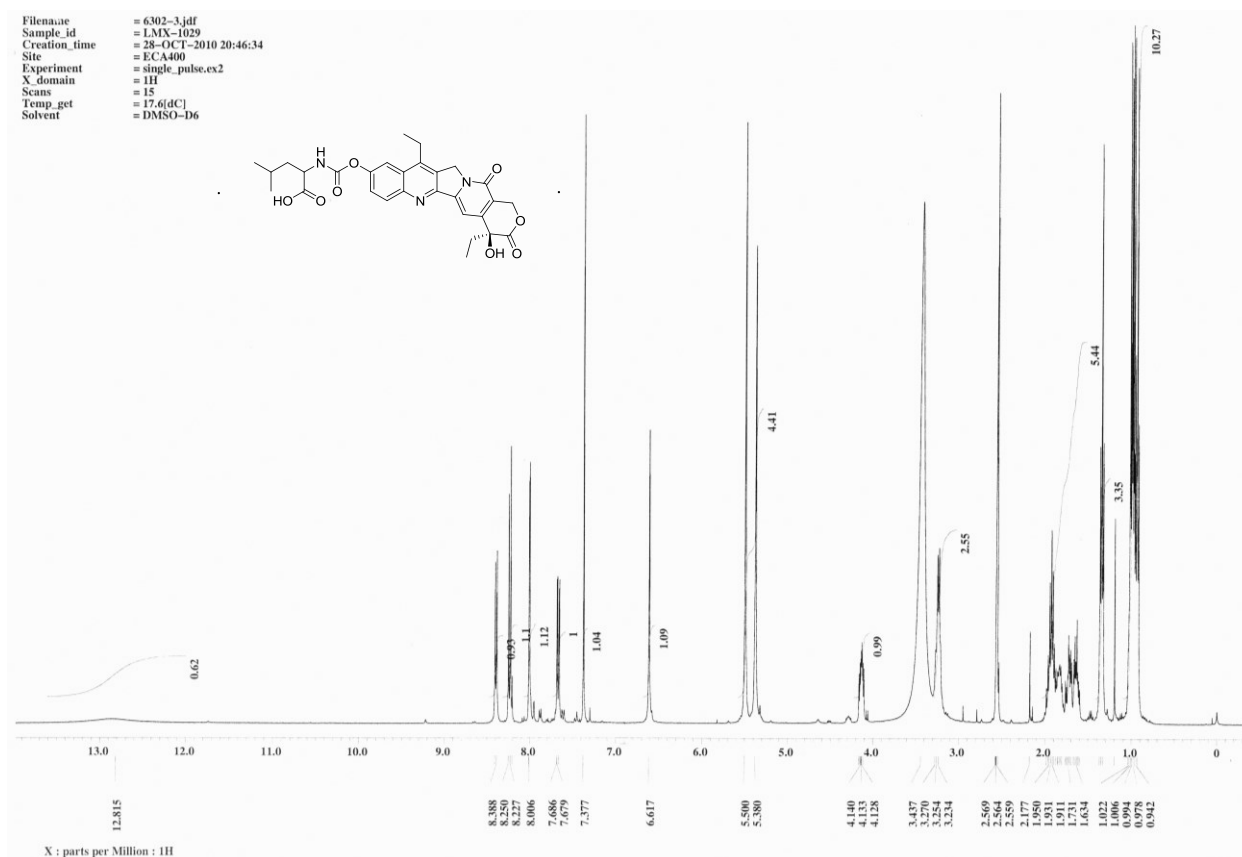Figure S20. MS spectra of **5e**.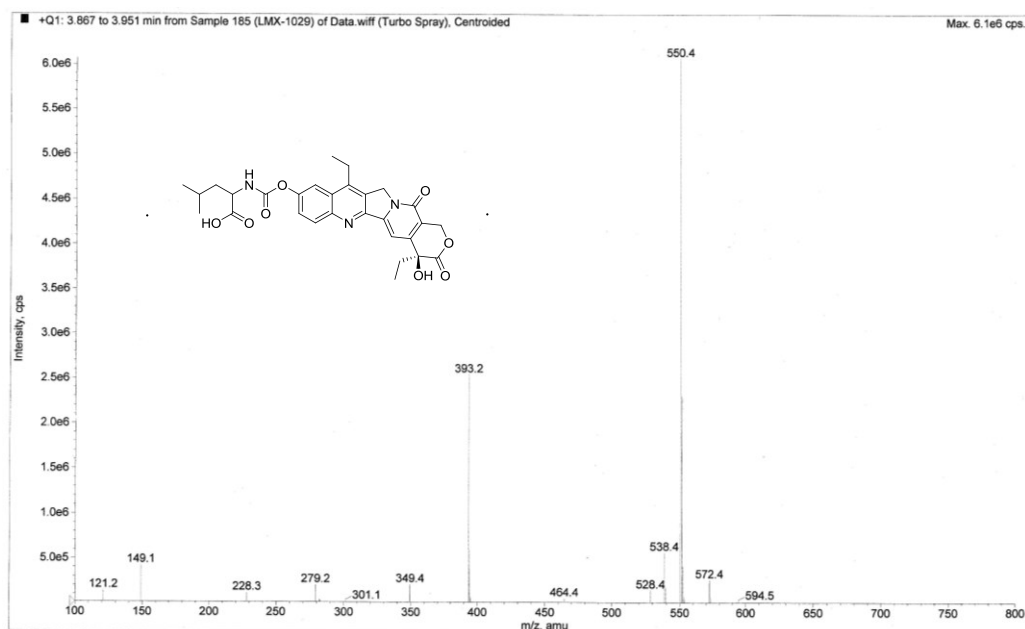

**Figure S21.**  $^1\text{H}$ -NMR spectra of **4f**.

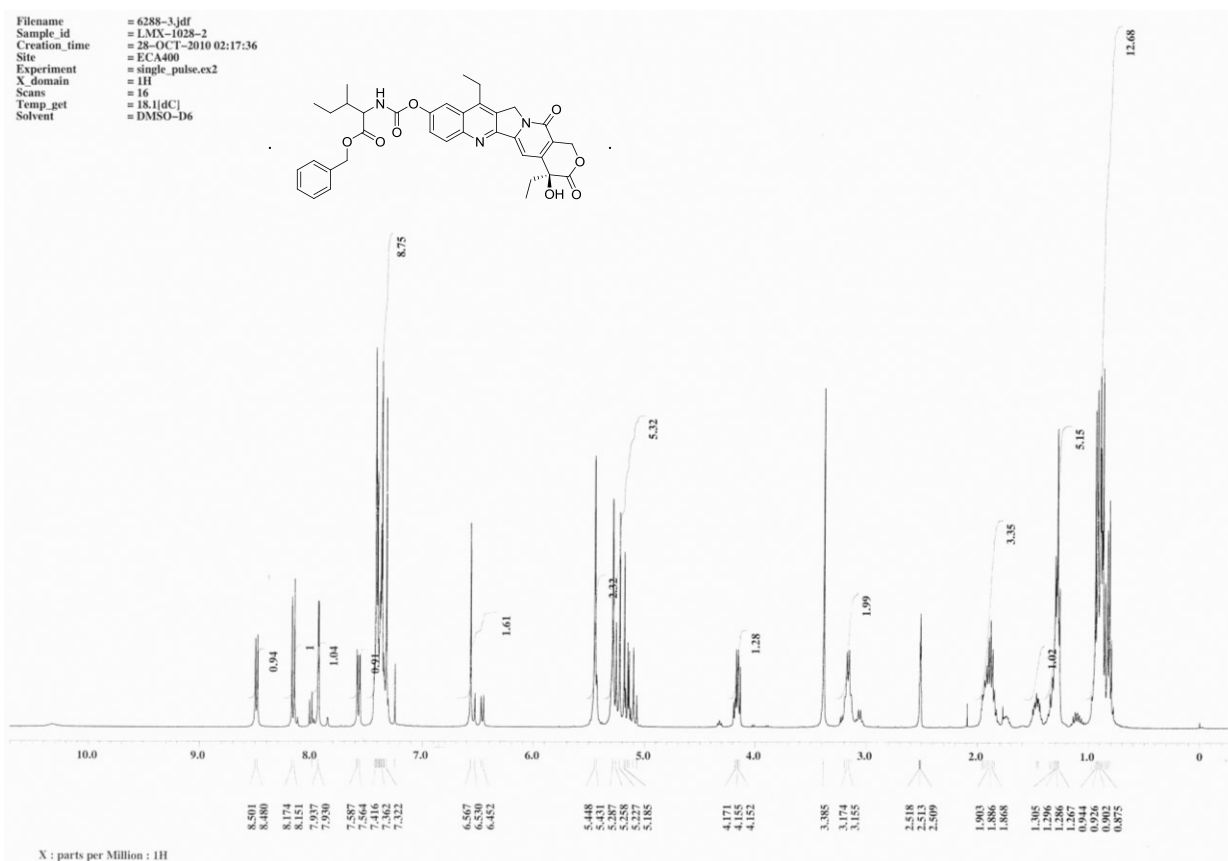

**Figure S22.** MS spectra of **4f**.

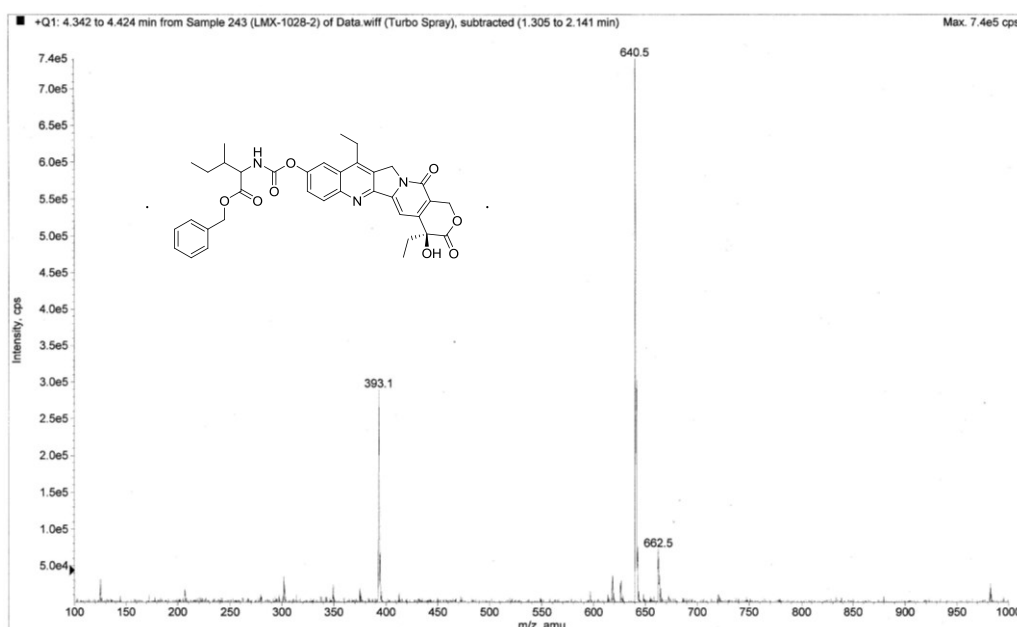

Figure S23.  $^1\text{H}$ -NMR spectra of **5f**.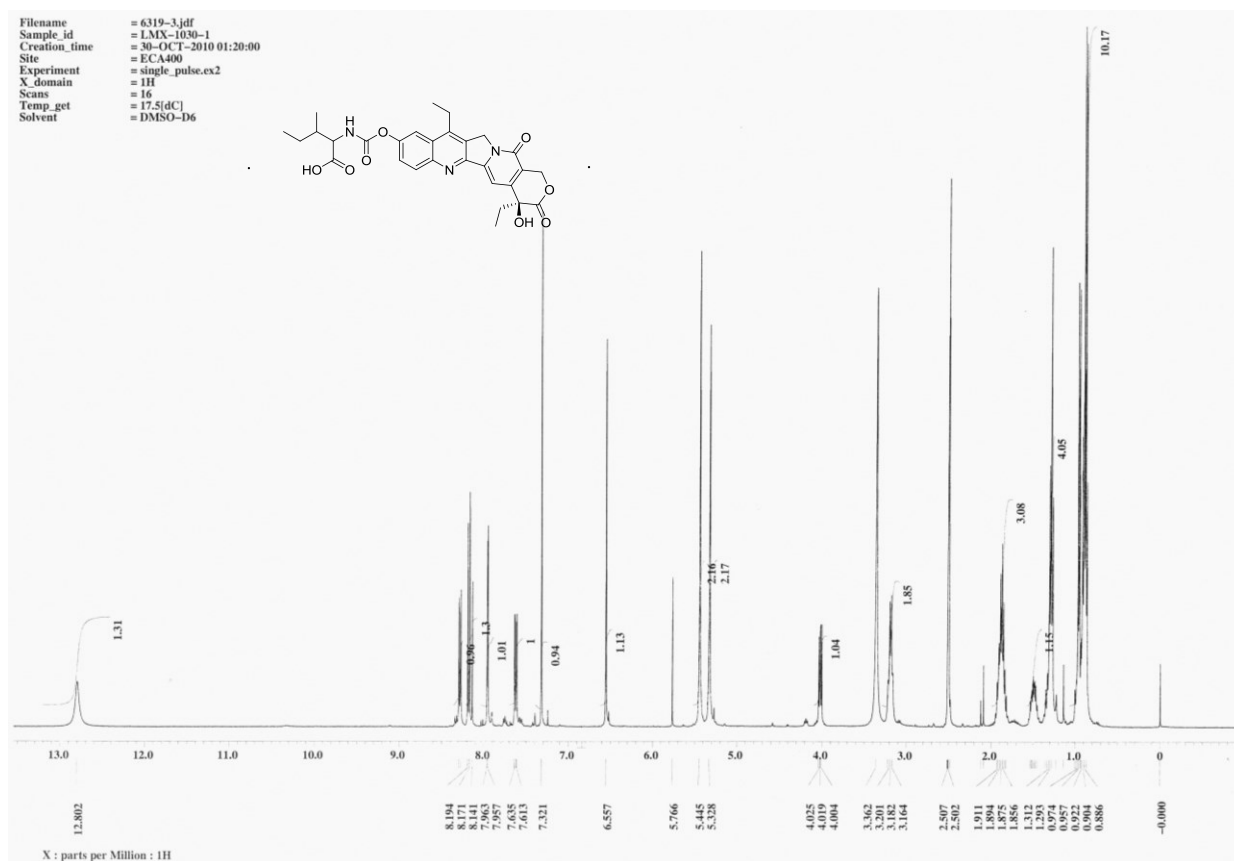Figure S24. MS spectra of **5f**.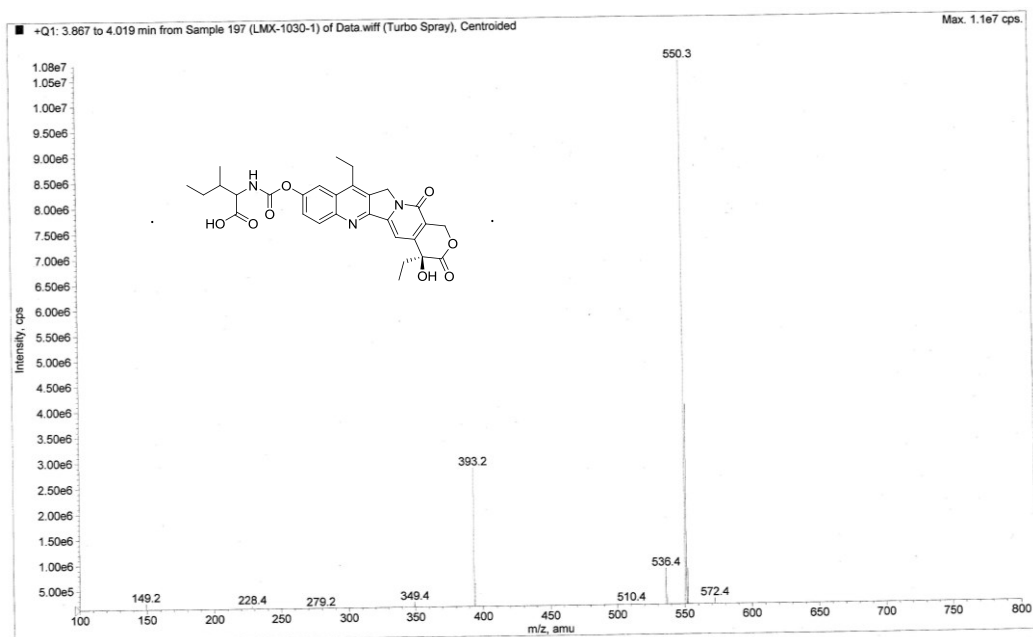

Figure S25.  $^1\text{H}$ -NMR spectra of **4g**.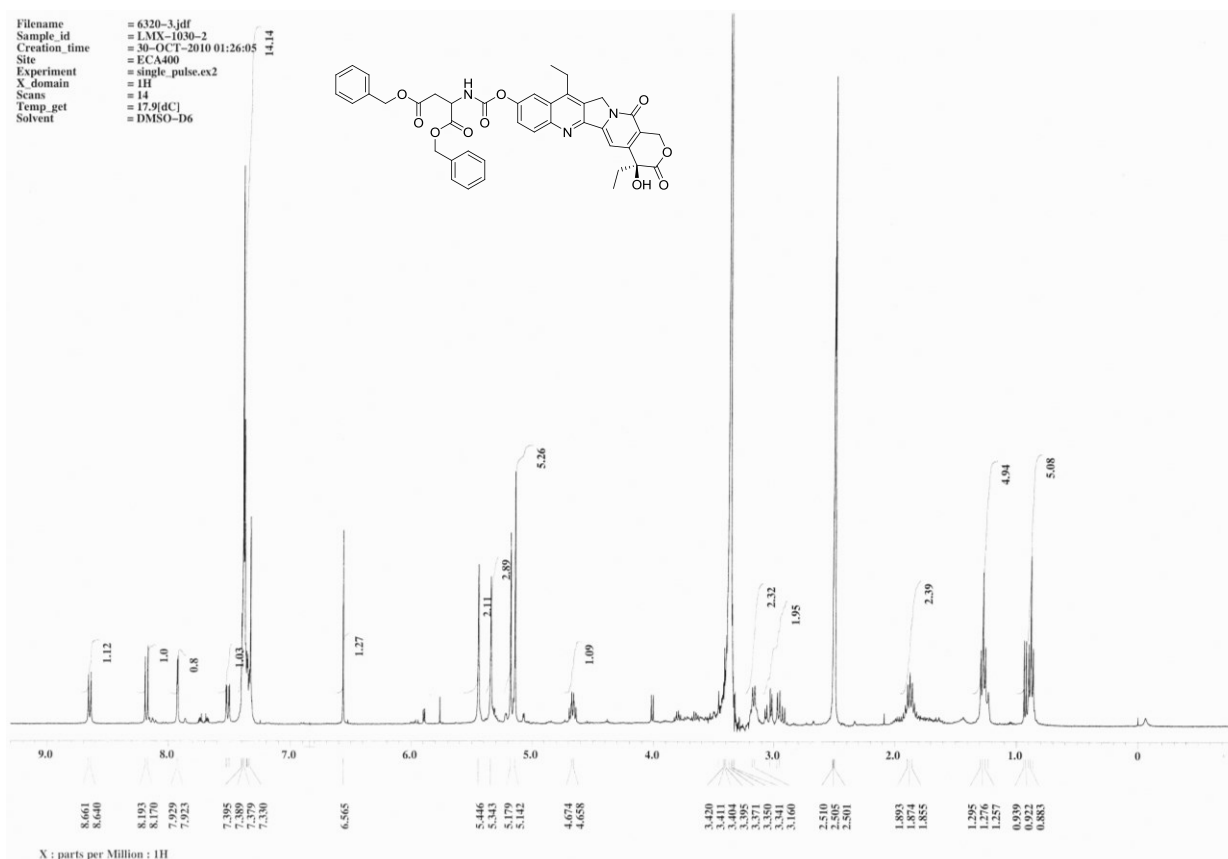Figure S26. MS spectra of **4g**.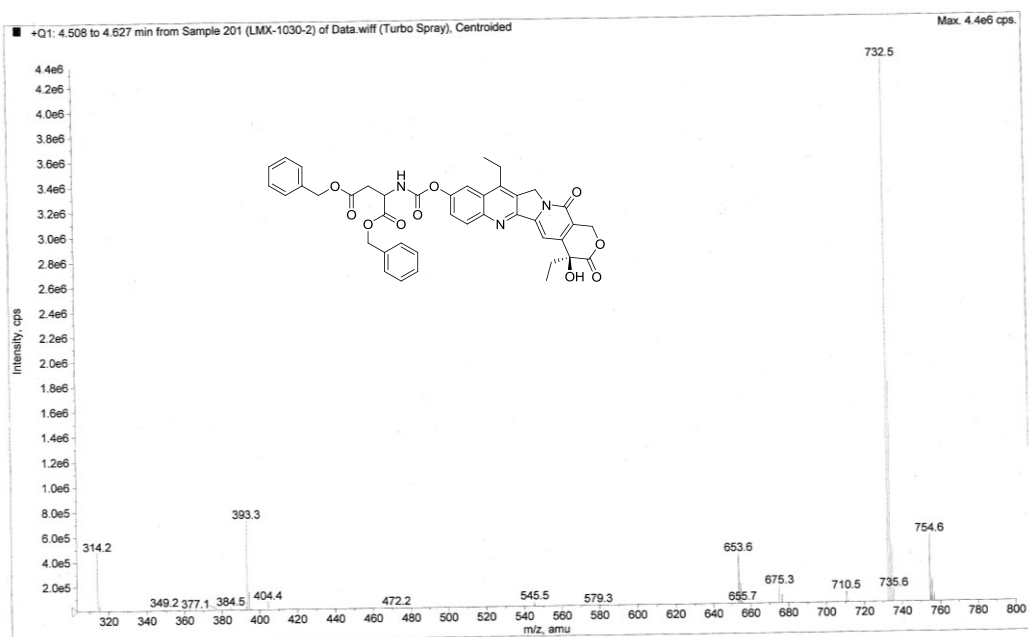

Figure S27.  $^1\text{H}$ -NMR spectra of **5g**.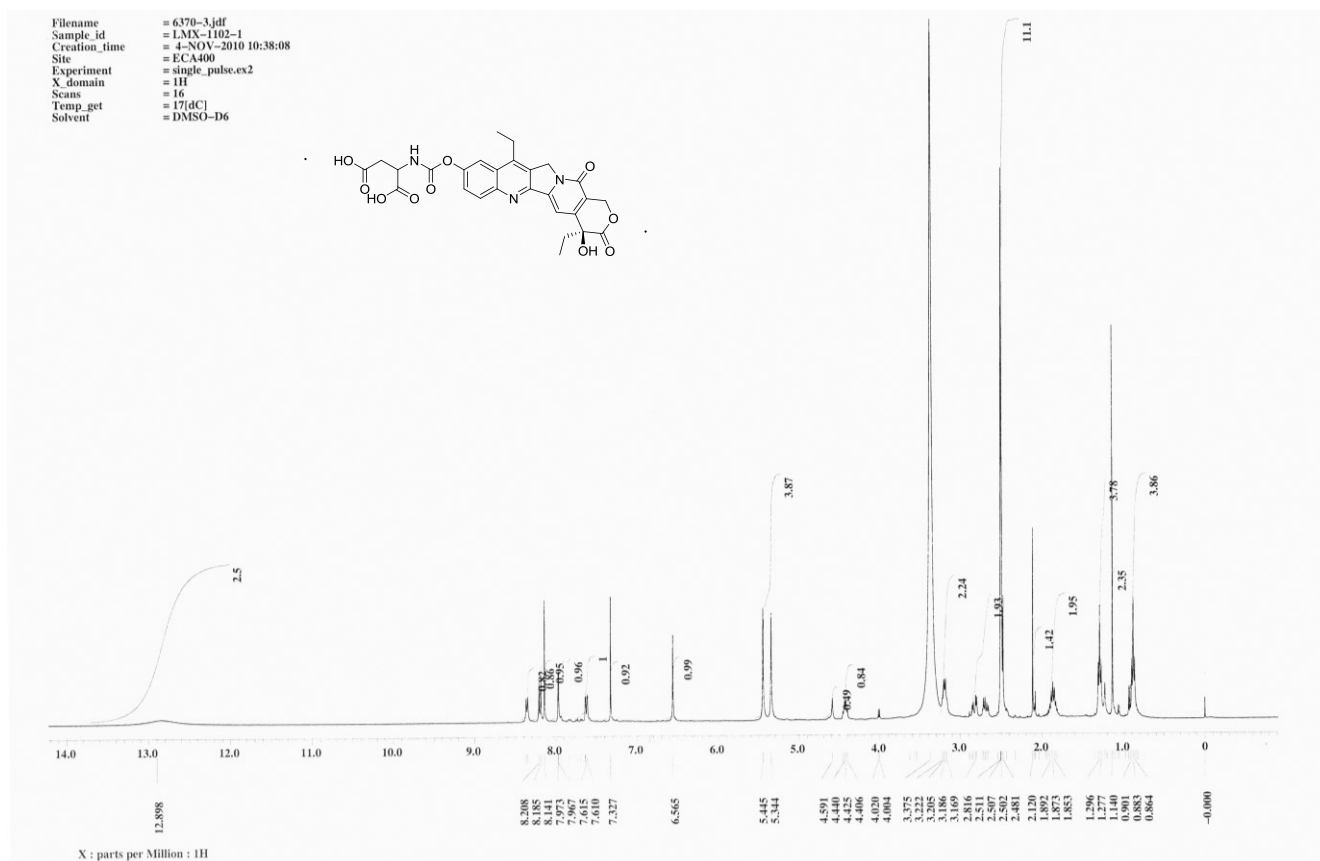Figure S28. MS spectra of **5g**.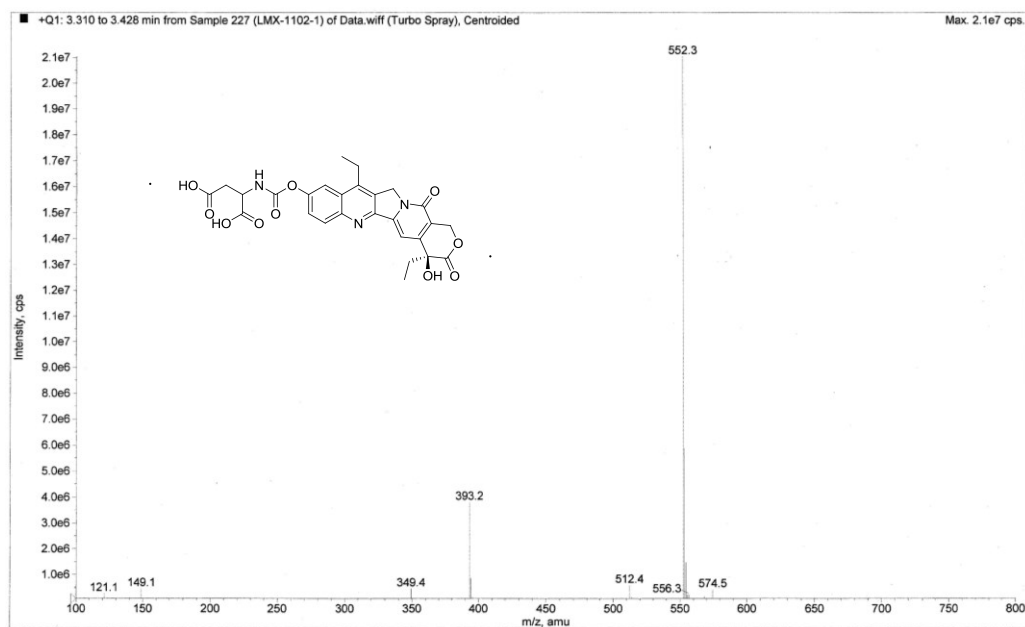

Figure S29.  $^1\text{H}$ -NMR spectra of **4h**.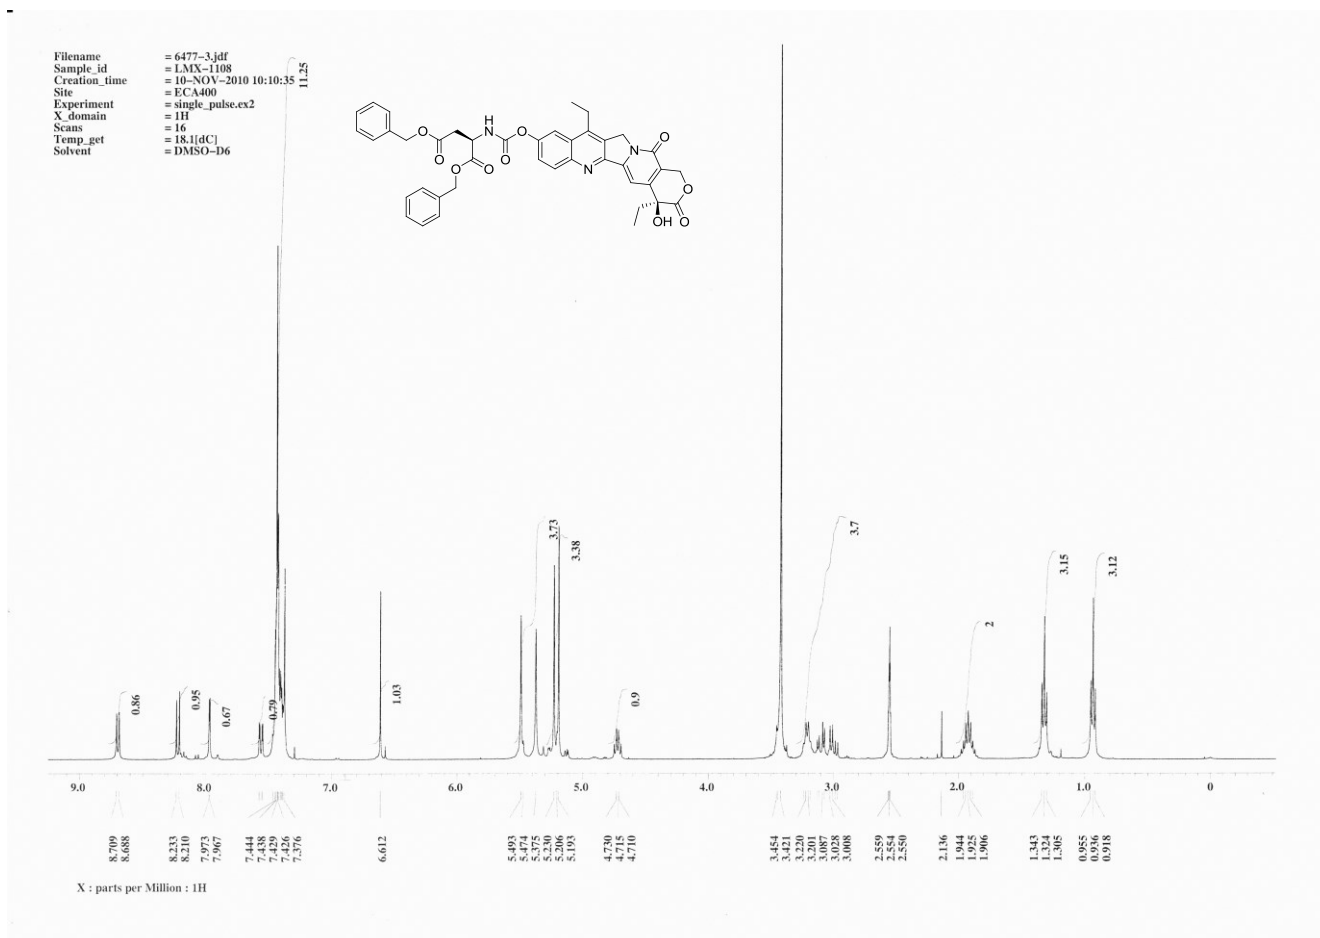Figure S30. MS spectra of **4h**.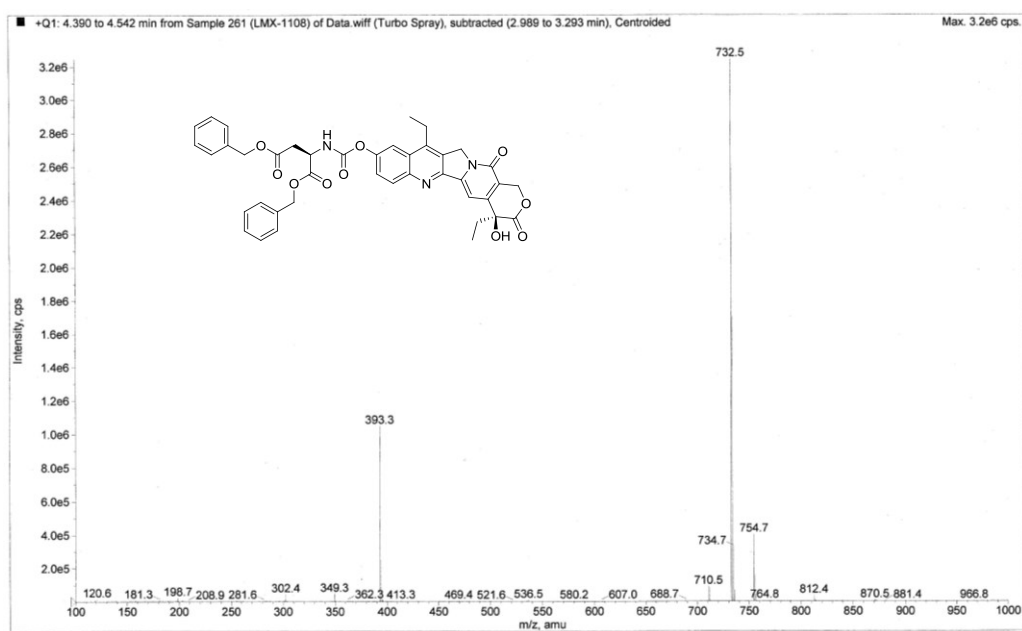

Figure S31.  $^1\text{H}$ -NMR spectra of **5h**.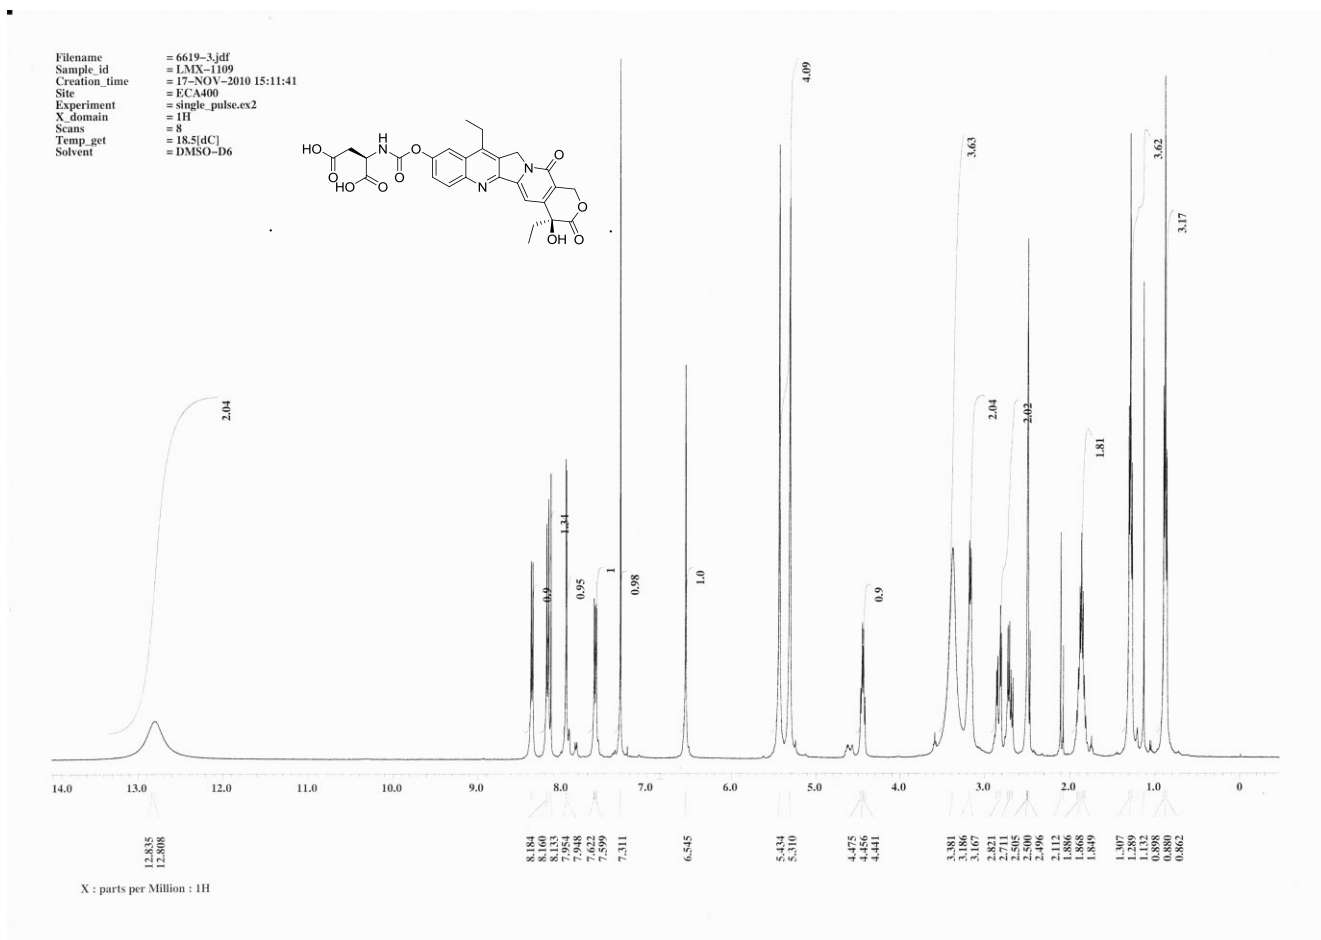Figure S32. MS spectra of **5h**.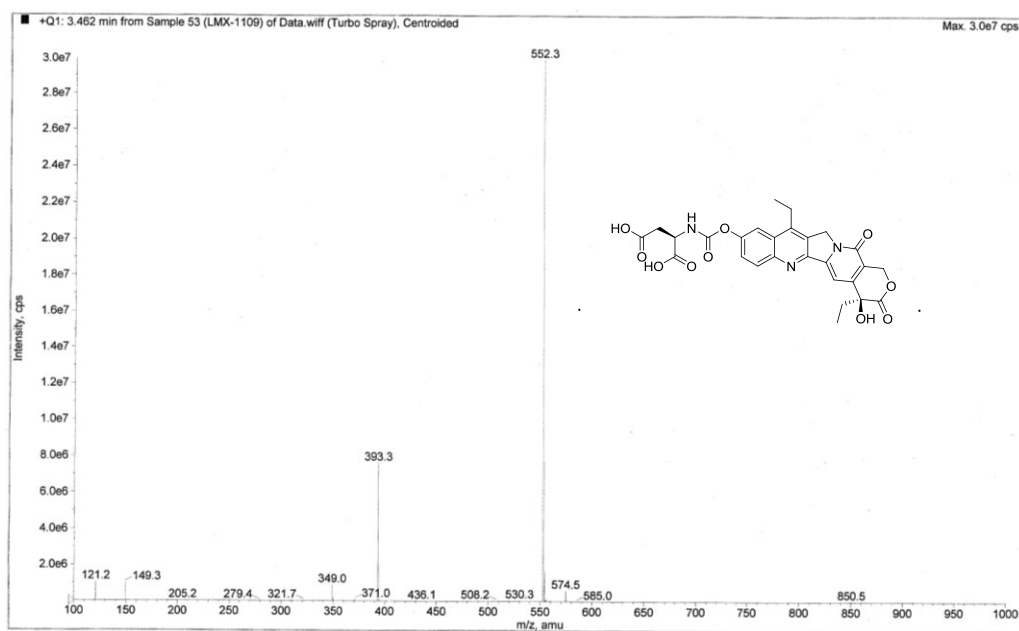



Figure S33.  $^1\text{H}$ -NMR spectra of 6a.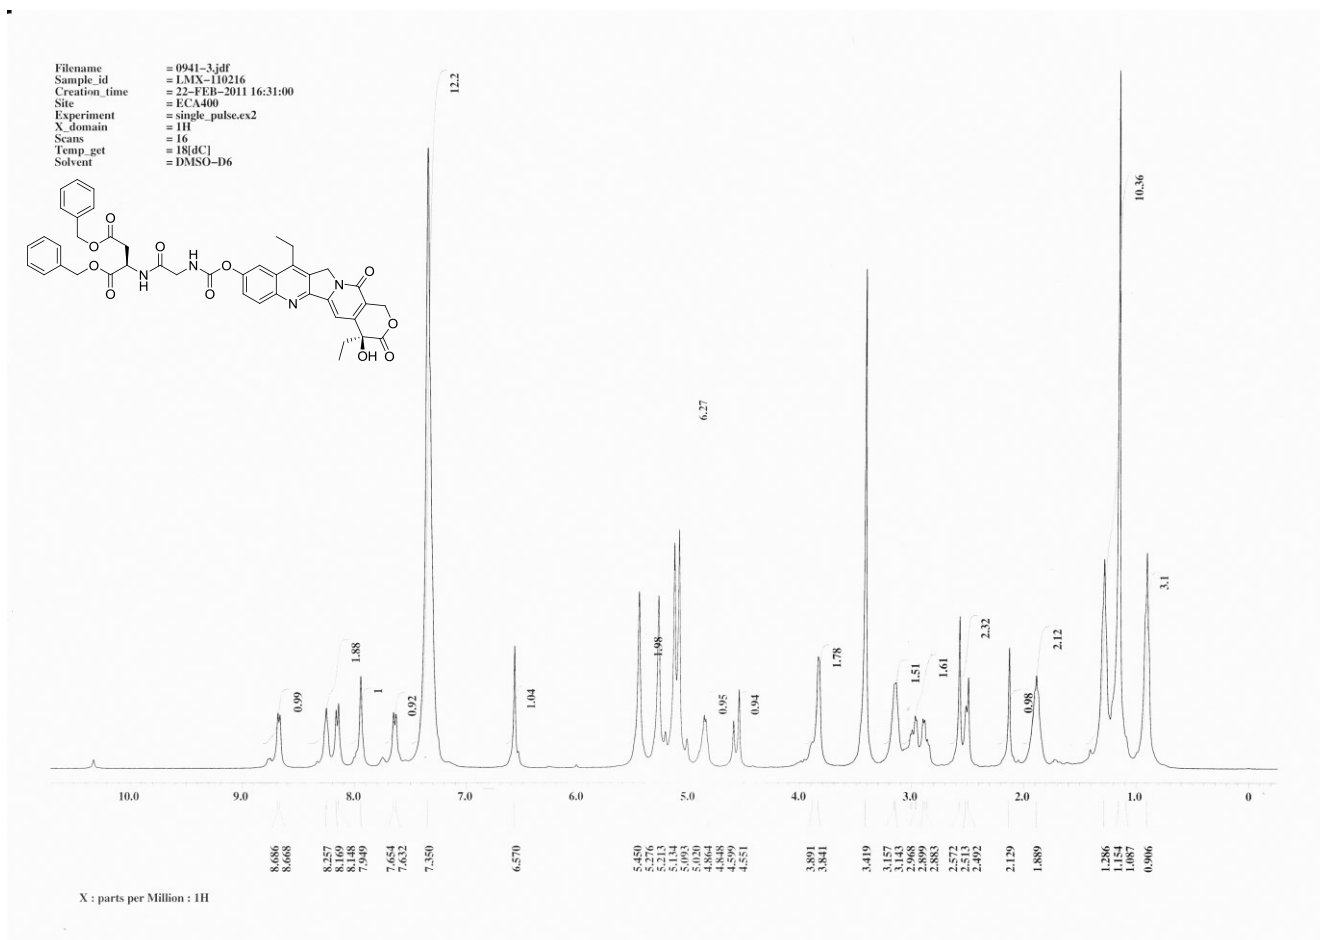

Figure S34. MS spectra of 6a.

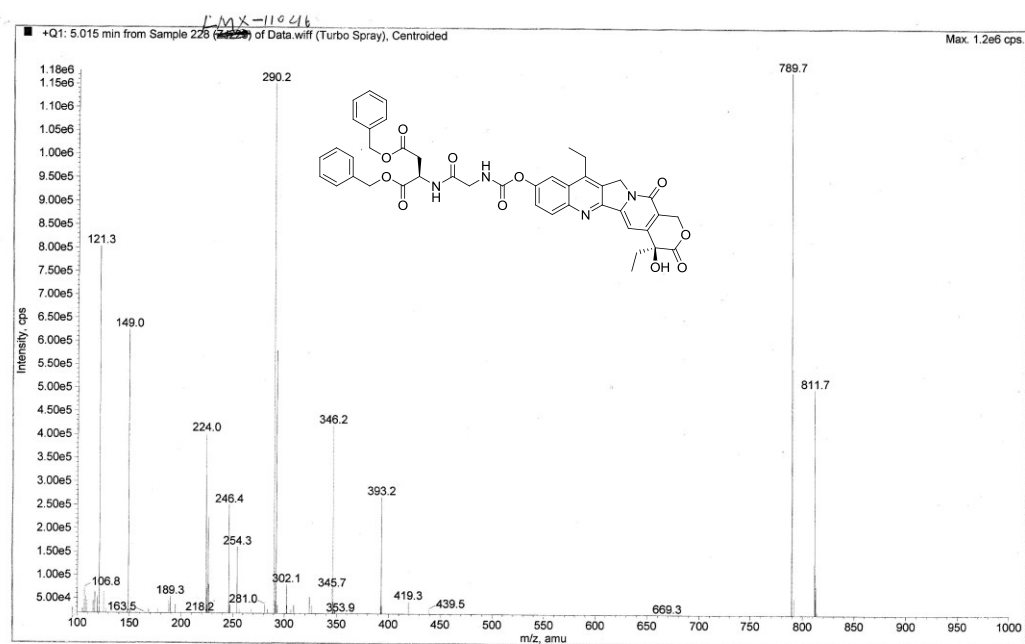

Figure S35.  $^1\text{H}$ -NMR spectra of **7a**.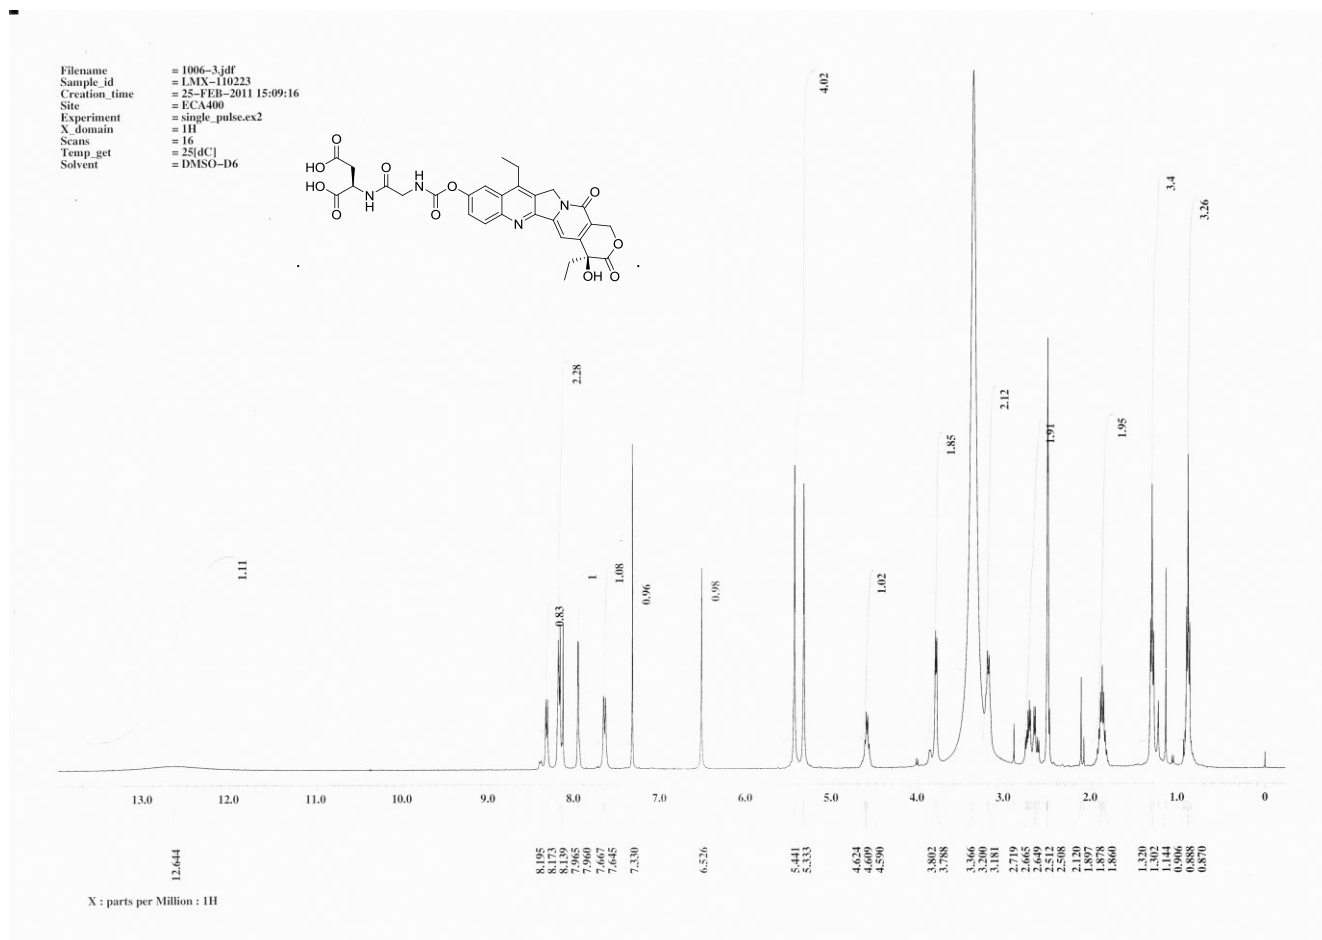Figure S36. MS spectra of **7a**.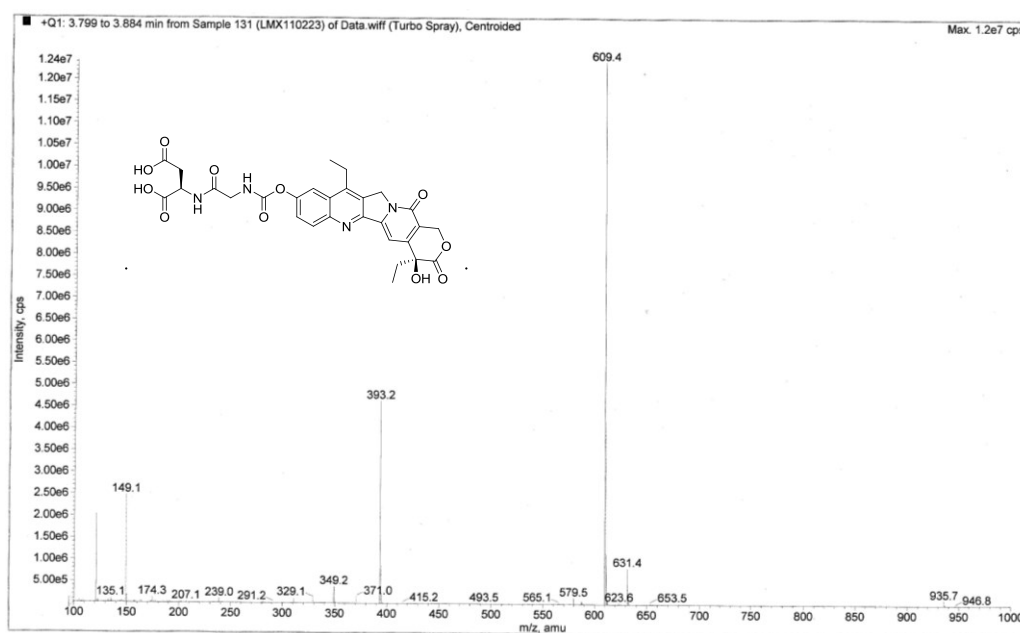

Figure S37.  $^1\text{H}$ -NMR spectra of **6b**.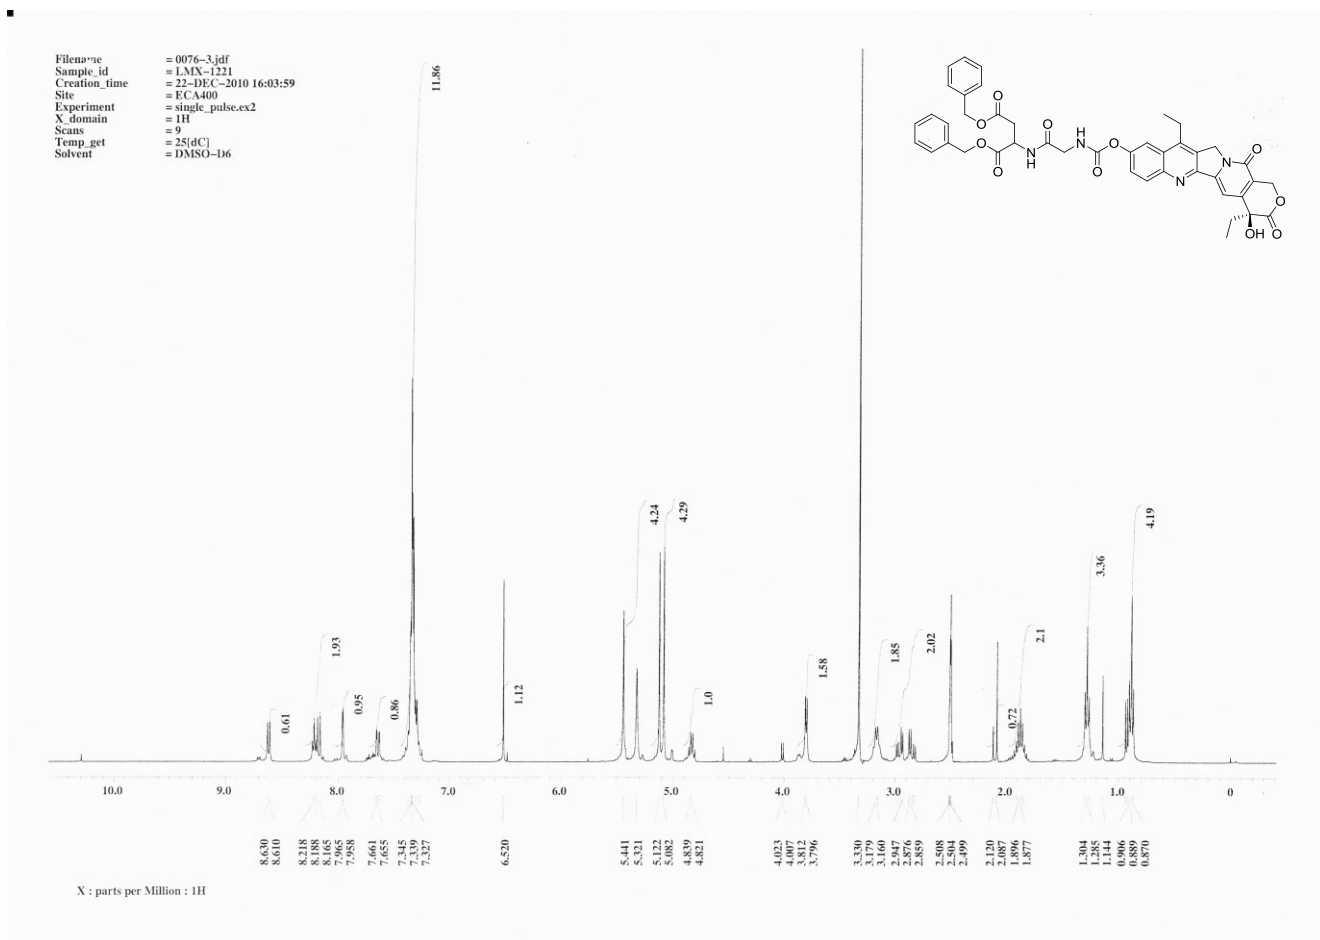Figure S38. MS spectra of **6b**.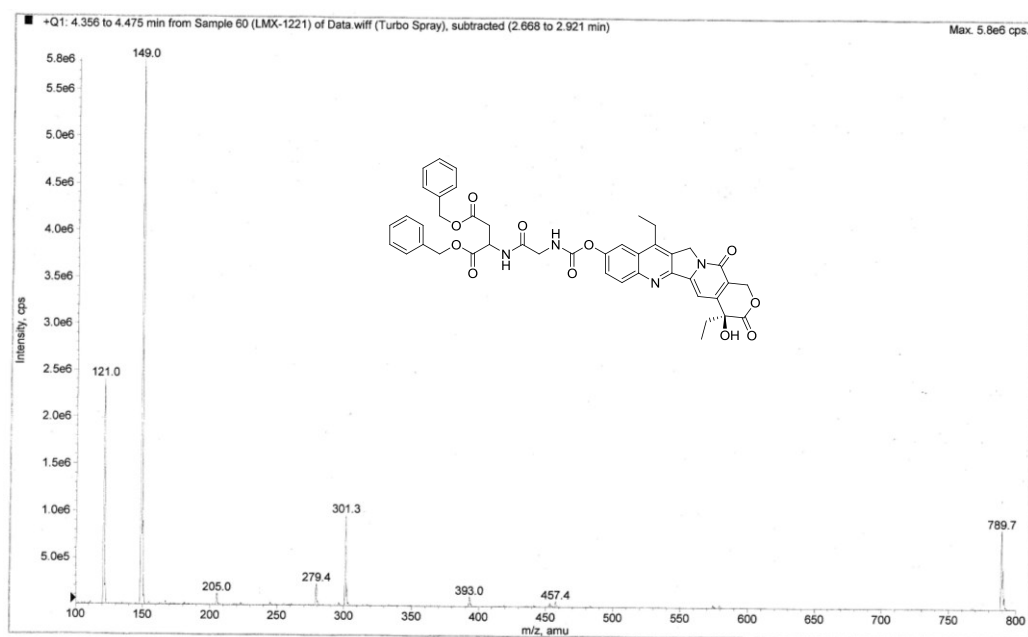

Figure S39.  $^1\text{H}$ -NMR spectra of 7b.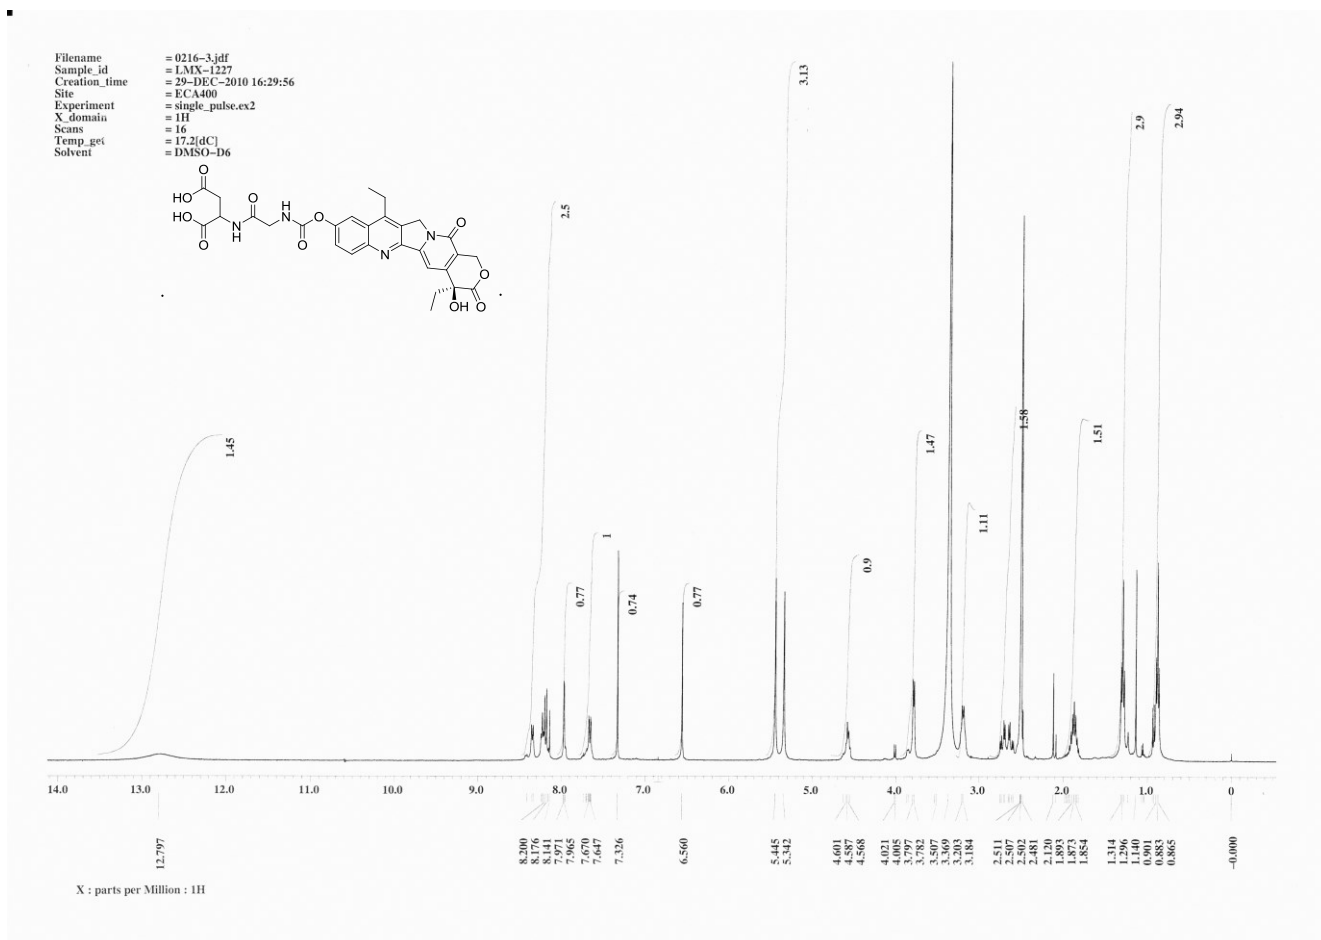

Figure S40. MS spectra of 7b.

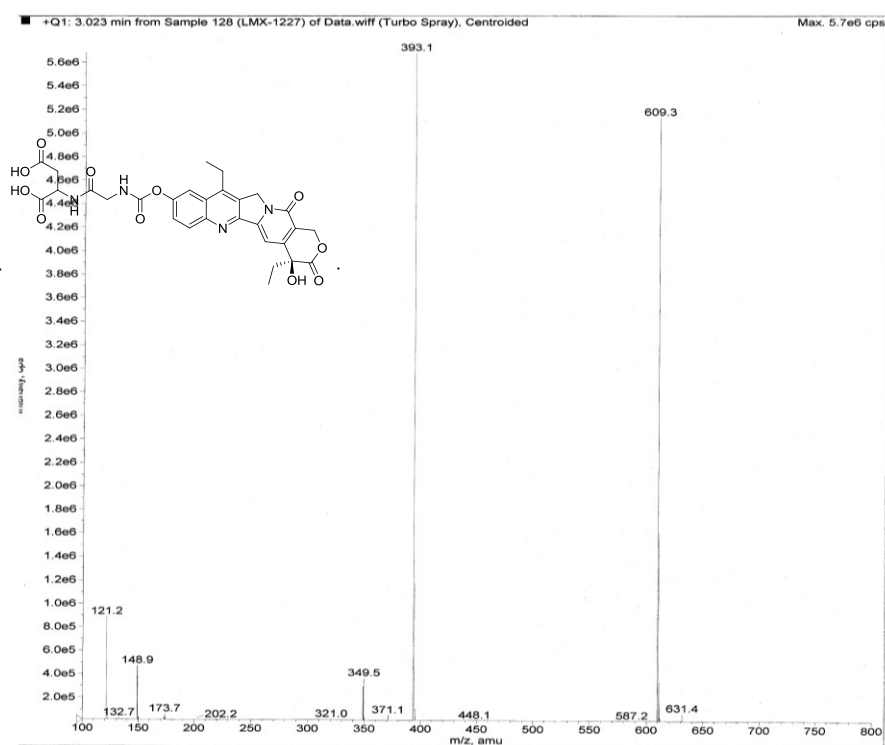

Figure S41.  $^1\text{H}$ -NMR spectra of **6c**.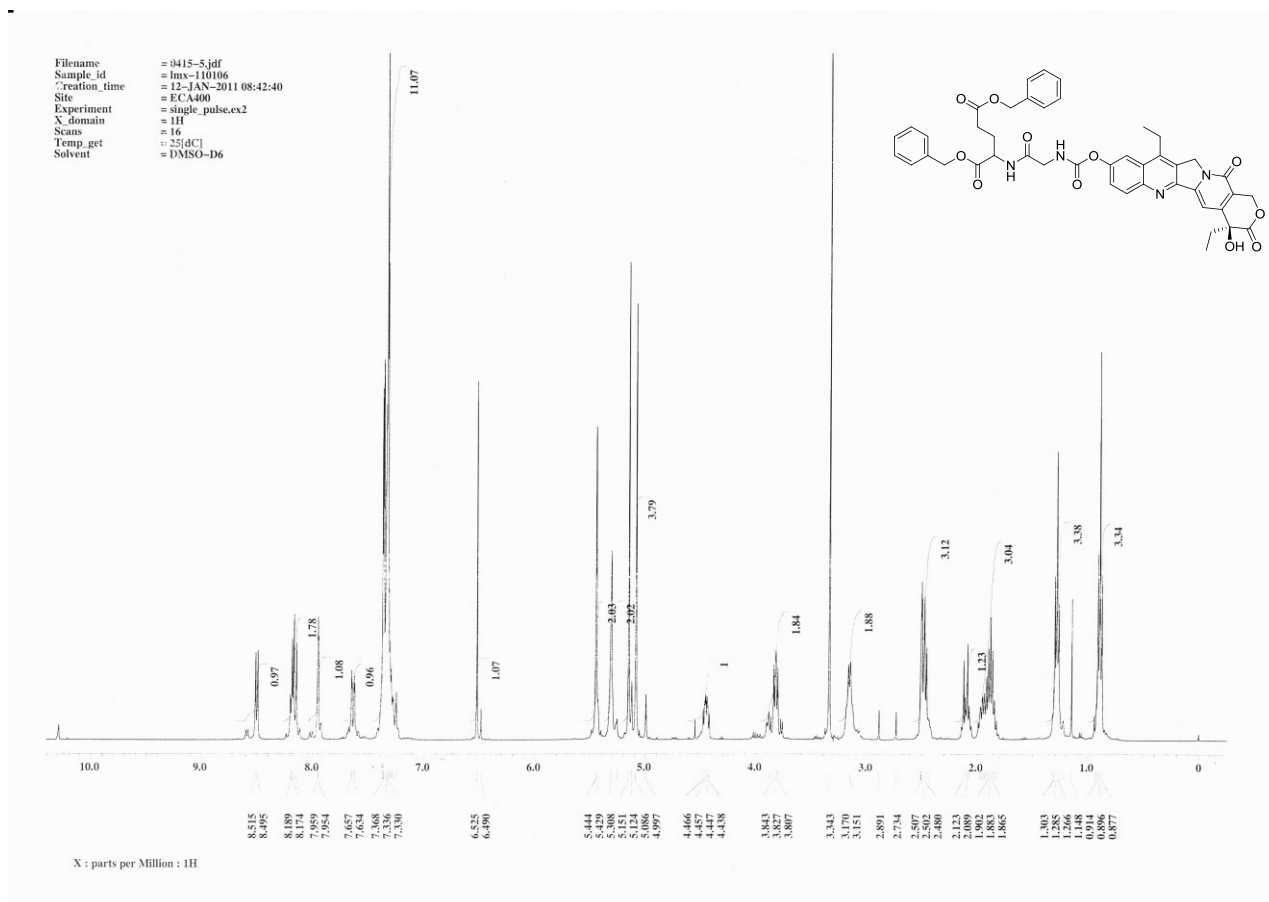

Figure S42.  $^1\text{H}$ -NMR spectra of 7c.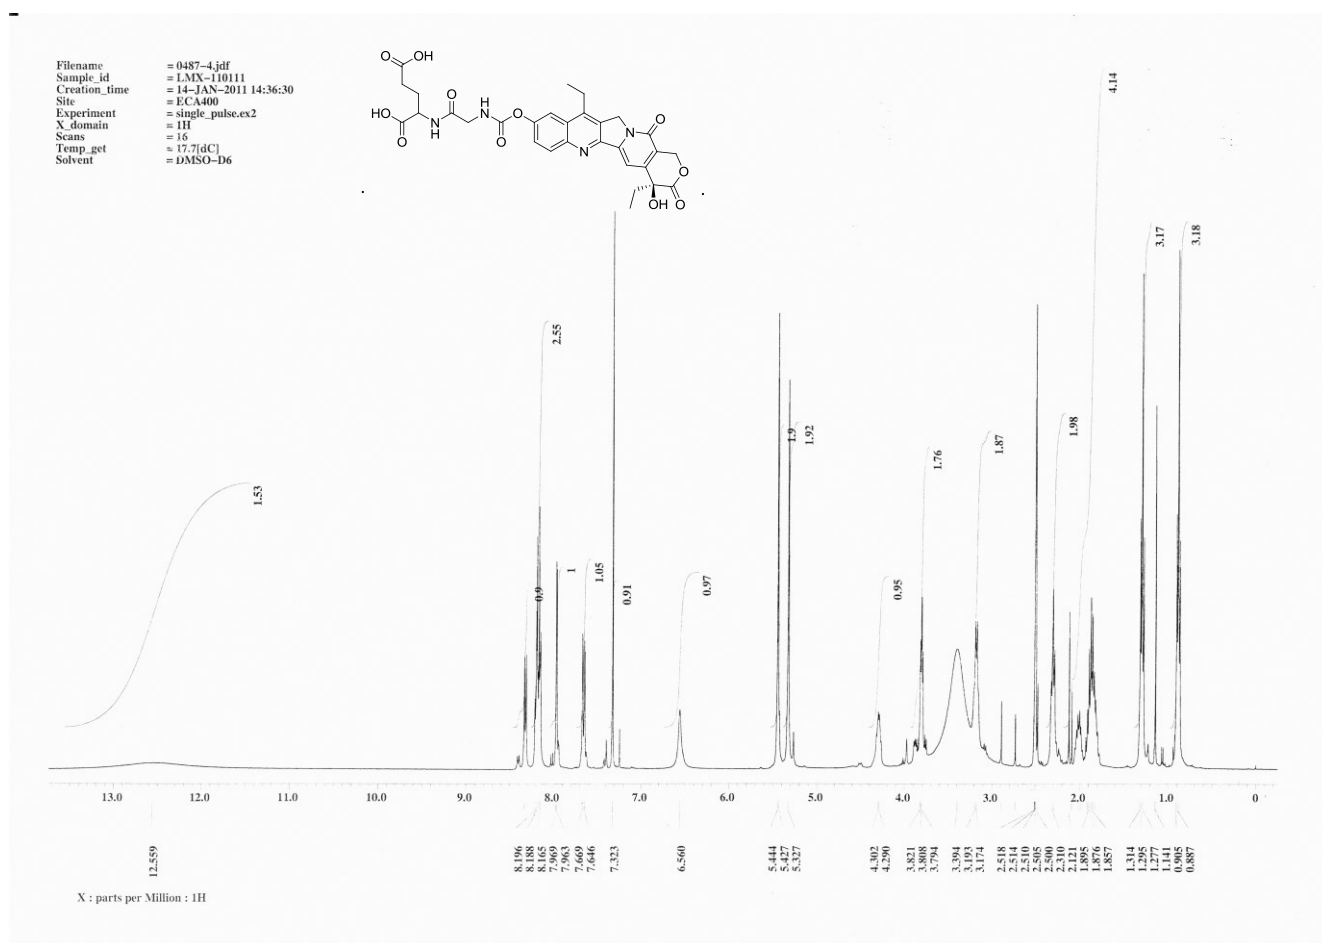

Figure S43. MS spectra of 7c.

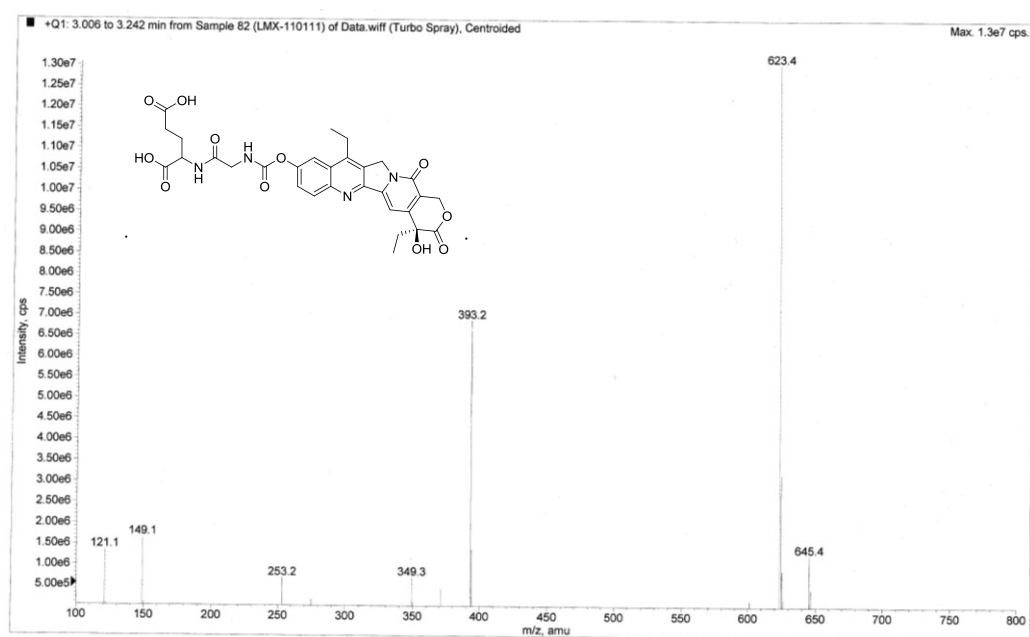

Figure S44.  $^1\text{H}$ -NMR spectra of 6d.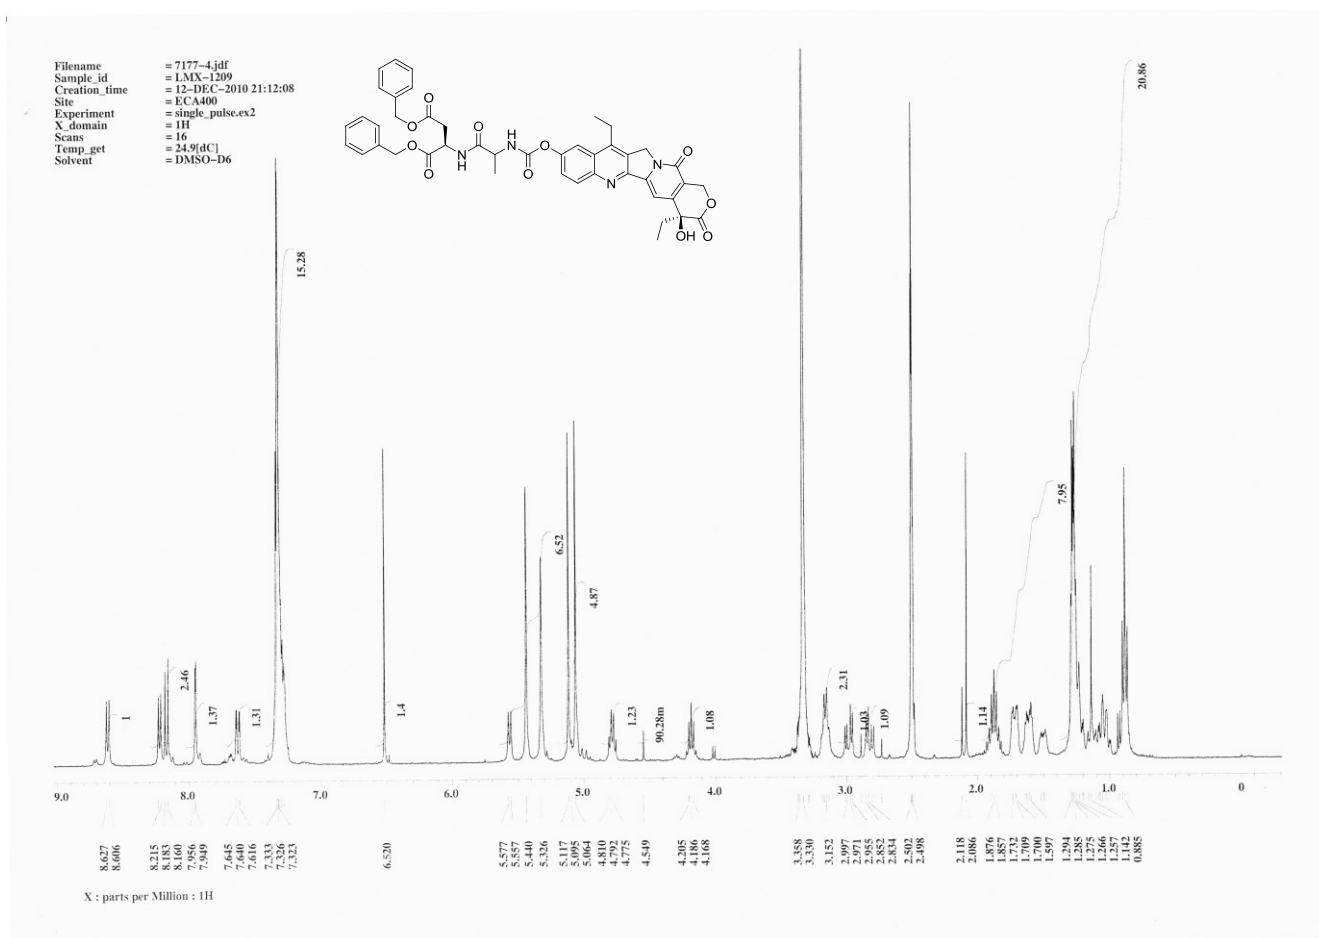

Figure S45. MS spectra for of 6d.

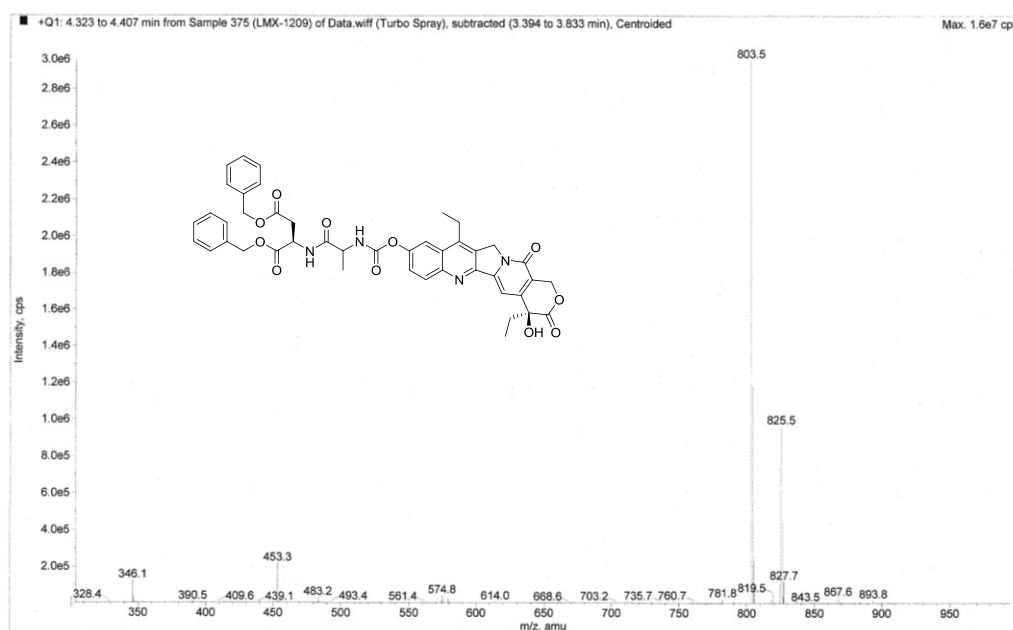

Figure S46.  $^1\text{H}$ -NMR spectra of 7d.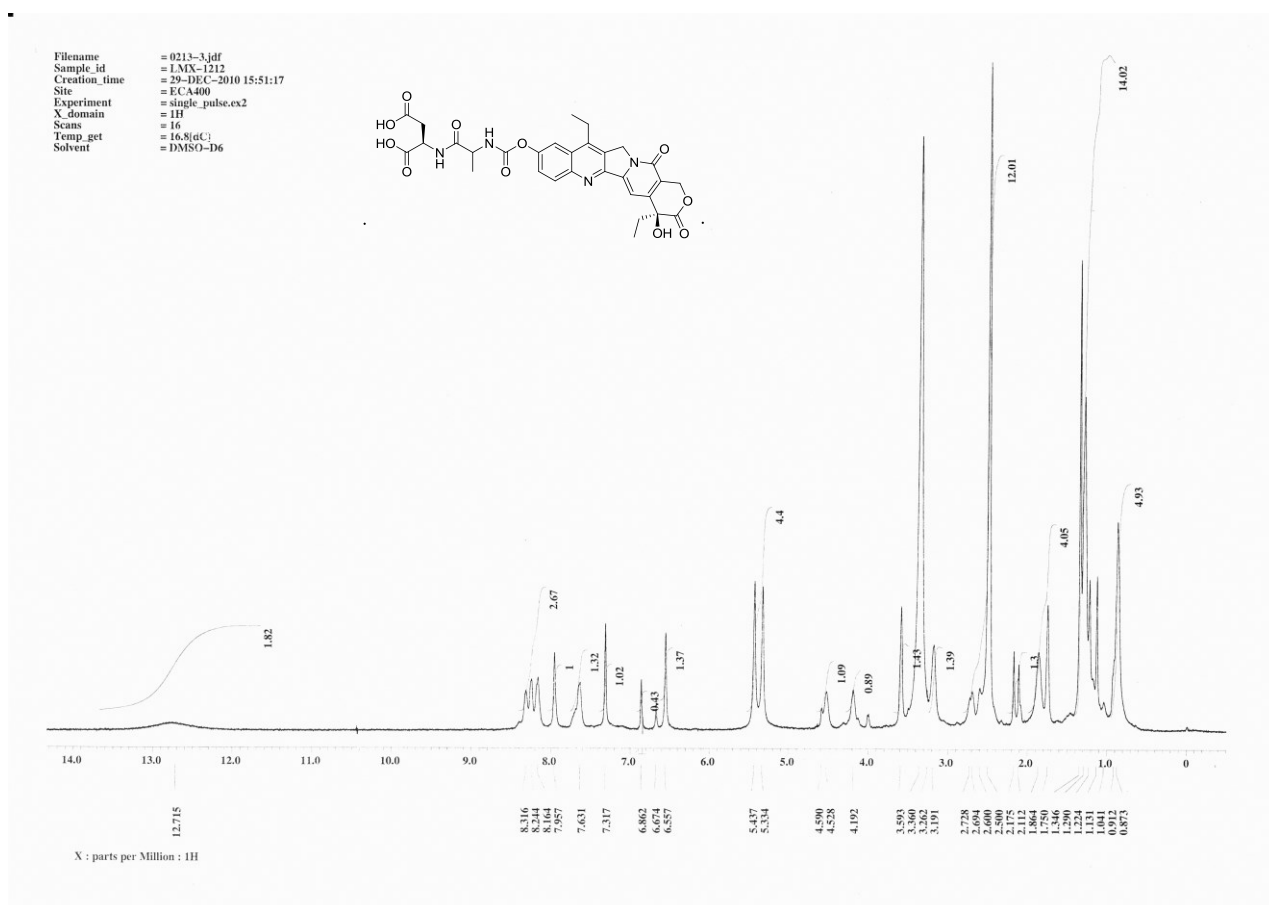

Figure S47. MS spectra of 7d.

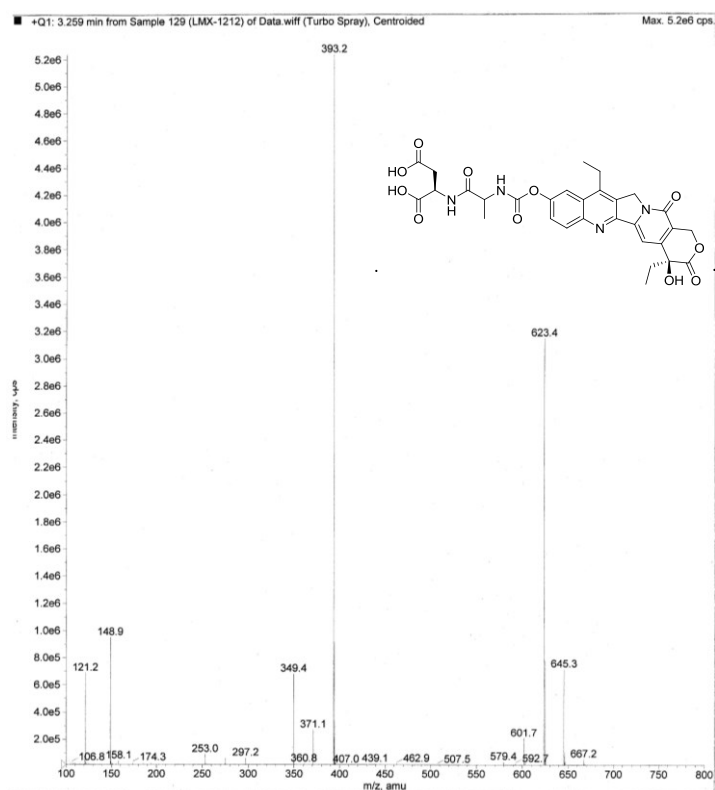



Figure S48.  $^1\text{H}$ -NMR spectra of 6e.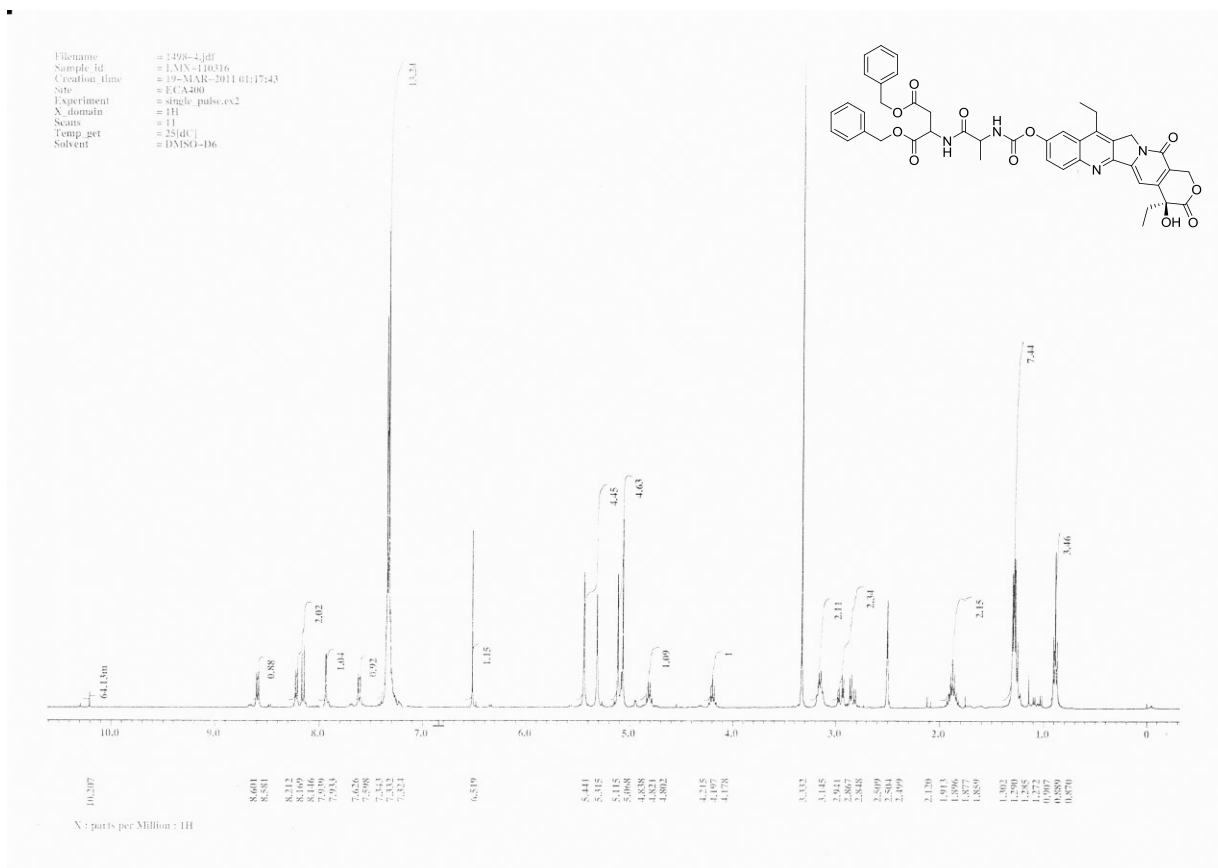

Figure S49. MS spectra of 6e.

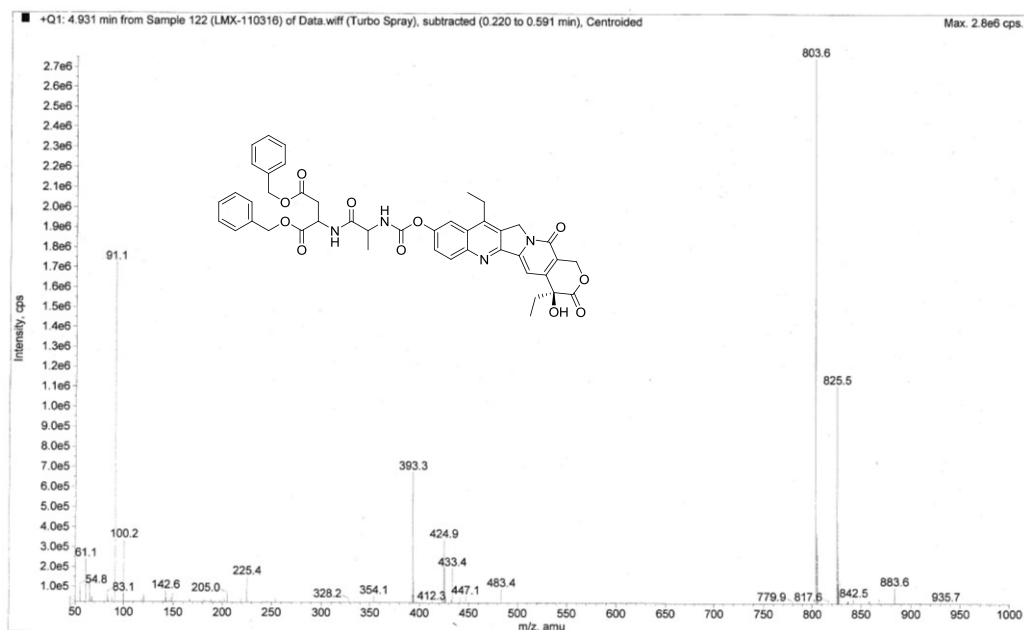

Figure S50.  $^1\text{H}$ -NMR spectra of 7e.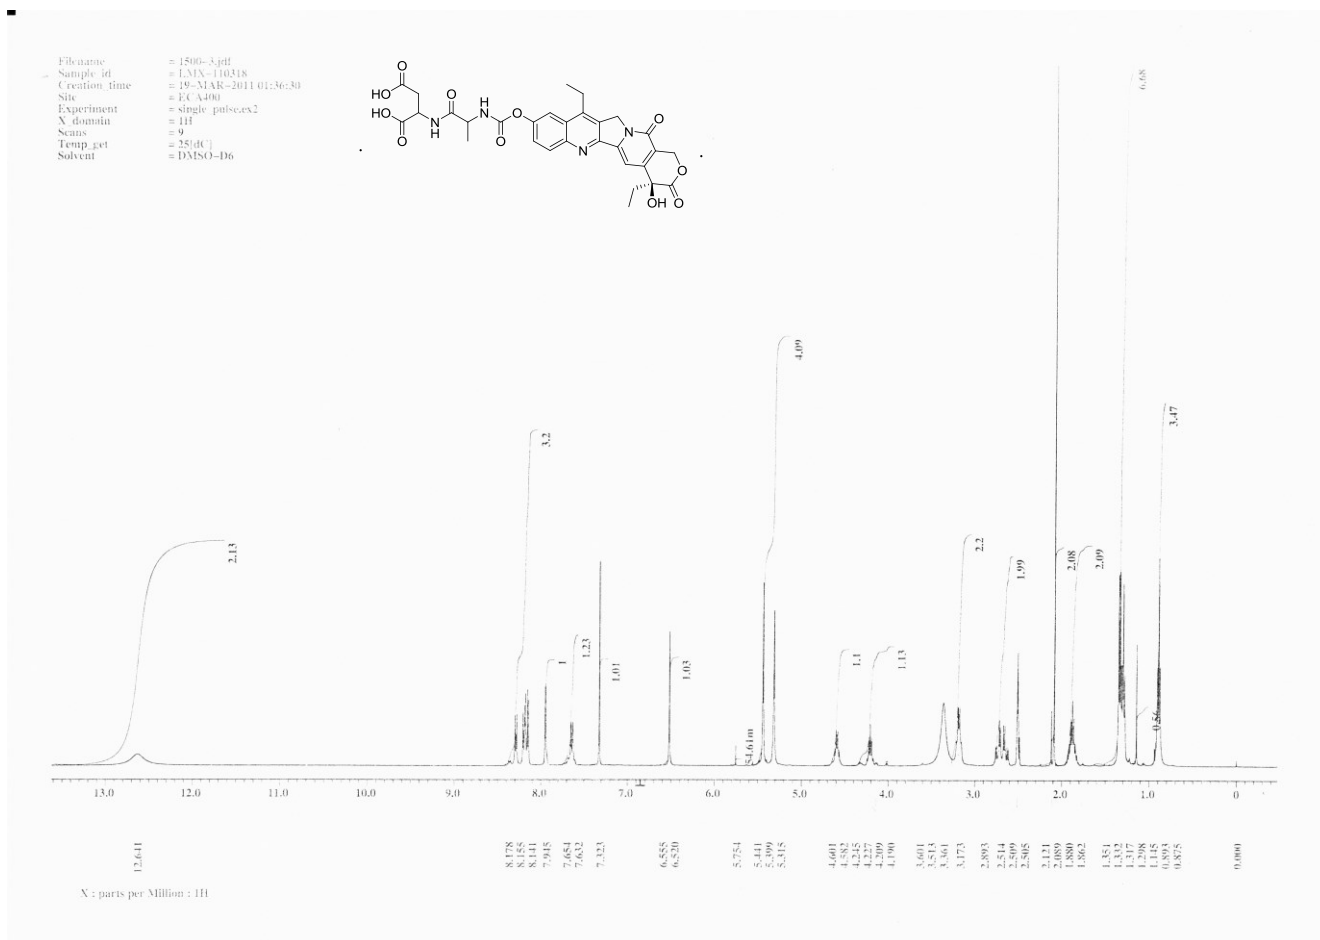

Figure S51. MS spectra of 7e.

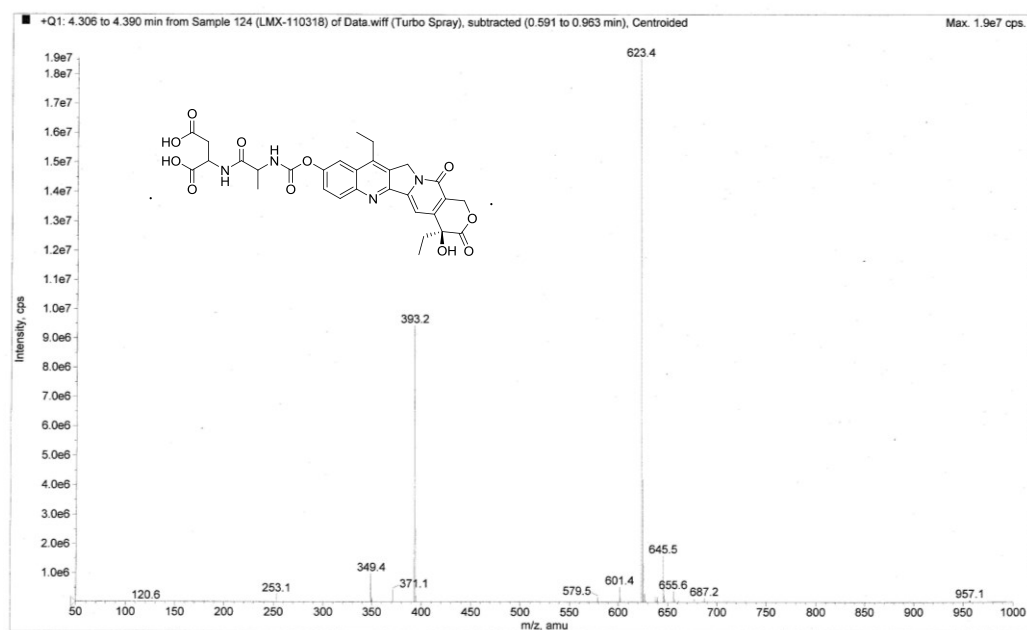

Figure S52.  $^1\text{H}$ -NMR spectra of **6f**.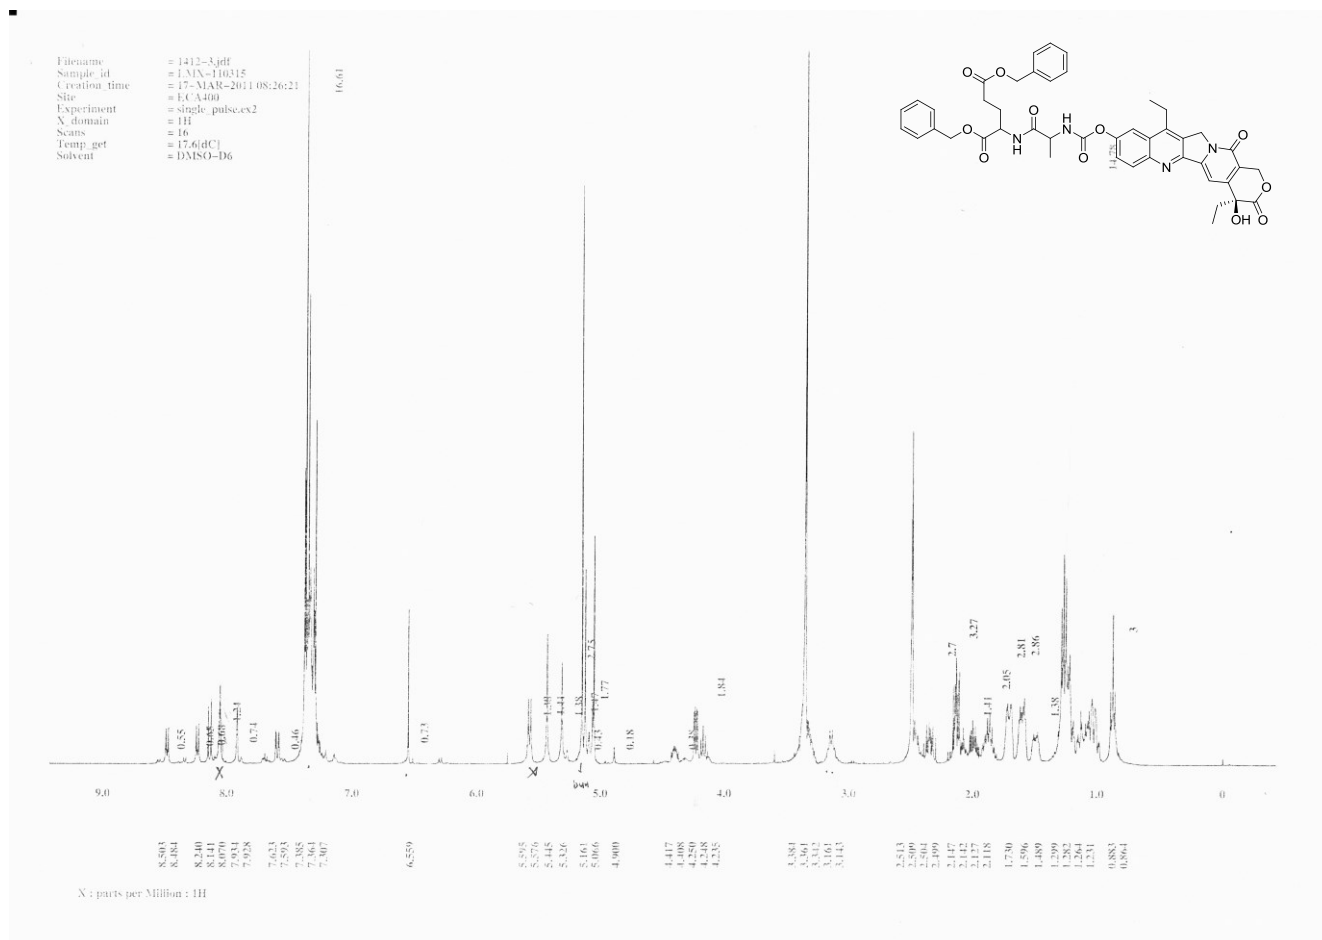Figure S53. MS spectra of **6f**.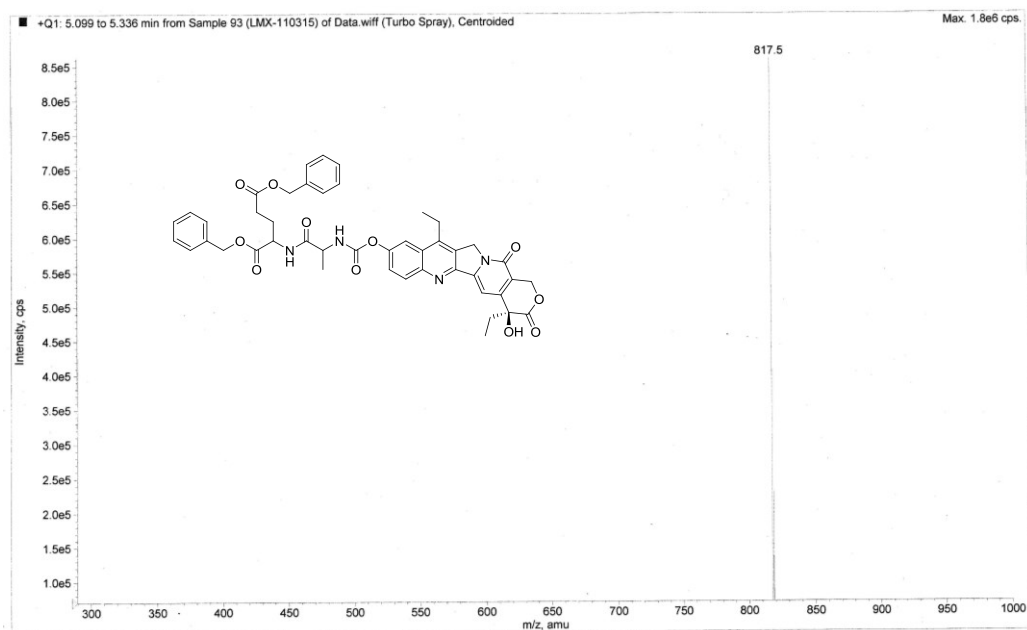

Figure S54.  $^1\text{H}$ -NMR spectra of **7f**.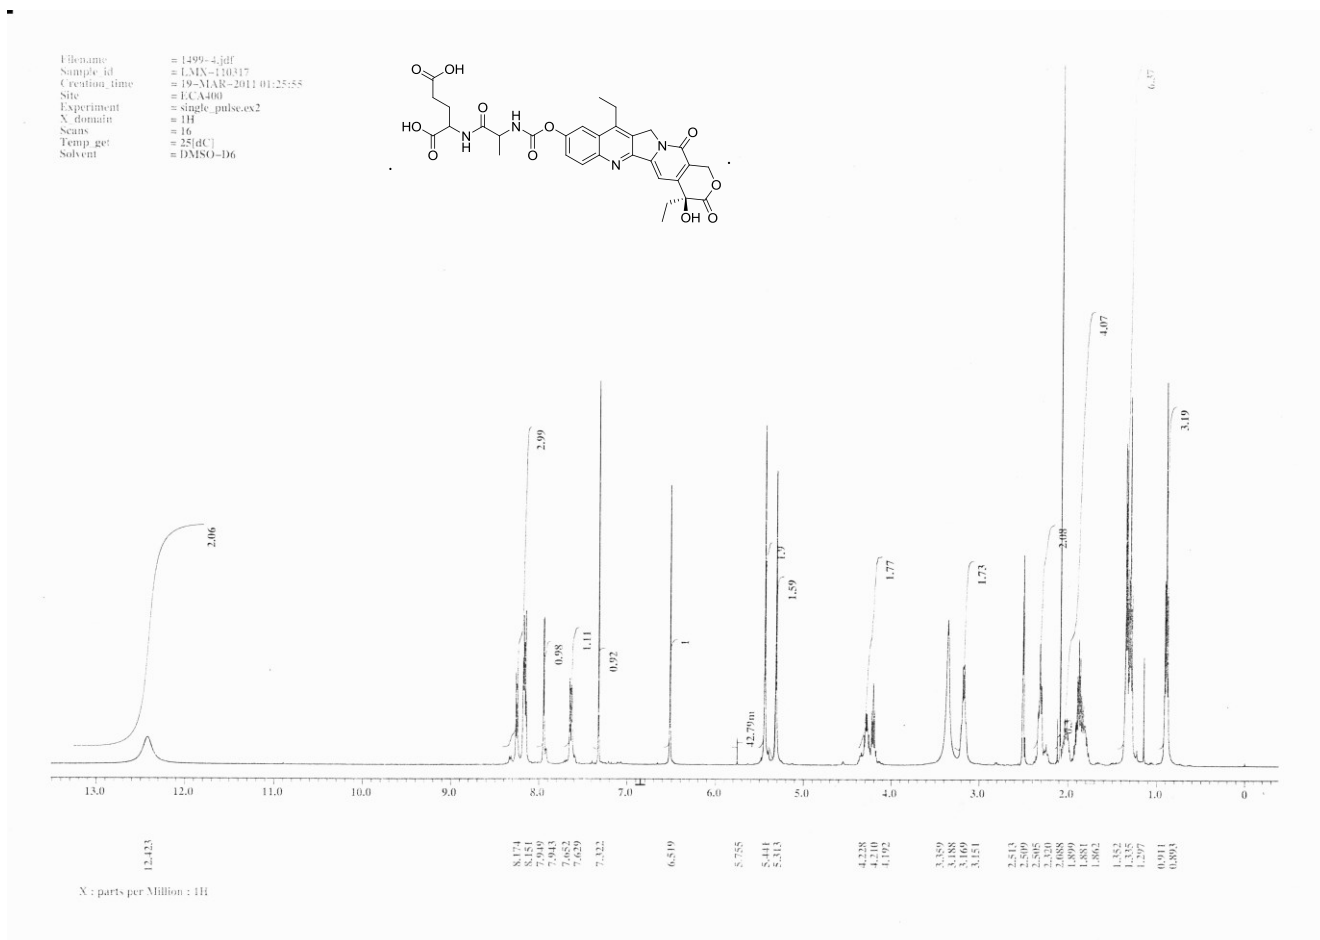Figure S55. MS spectra of **7f**.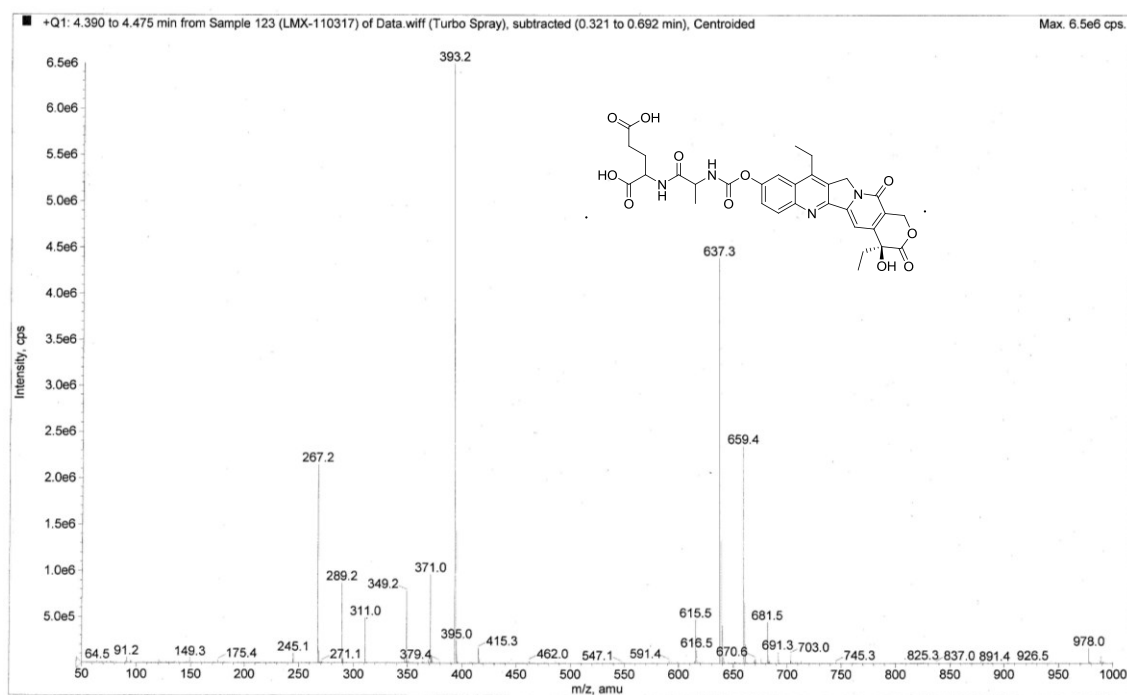

Figure S56. HRMS spectra of 5a.

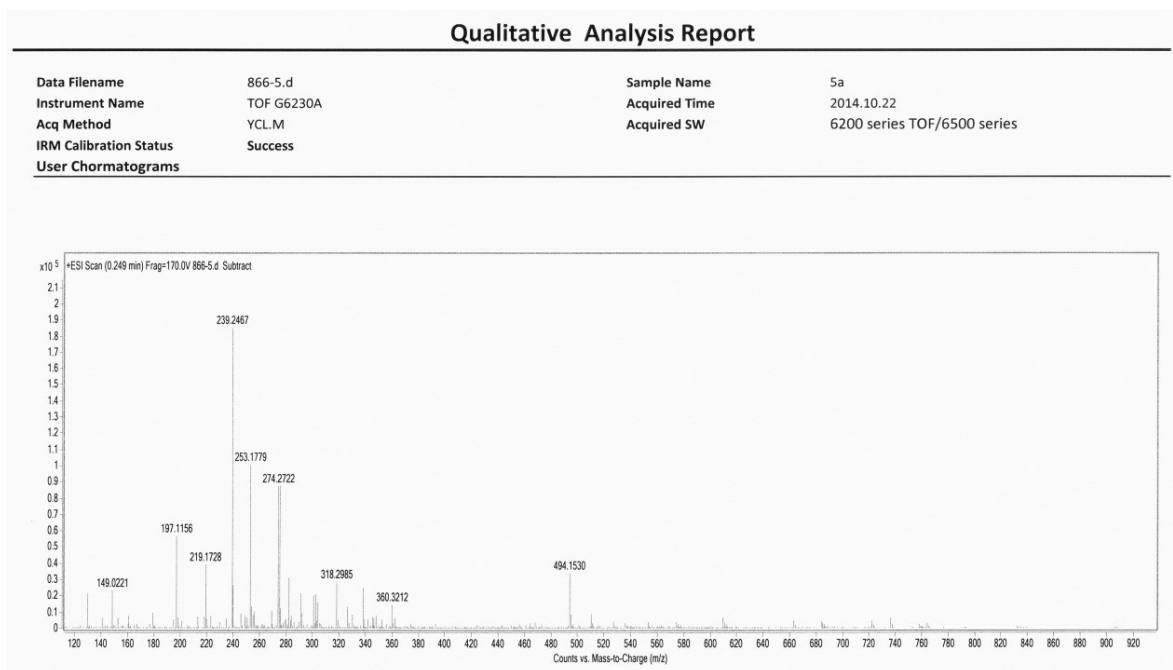

Figure S57. HRMS spectra of 5b.

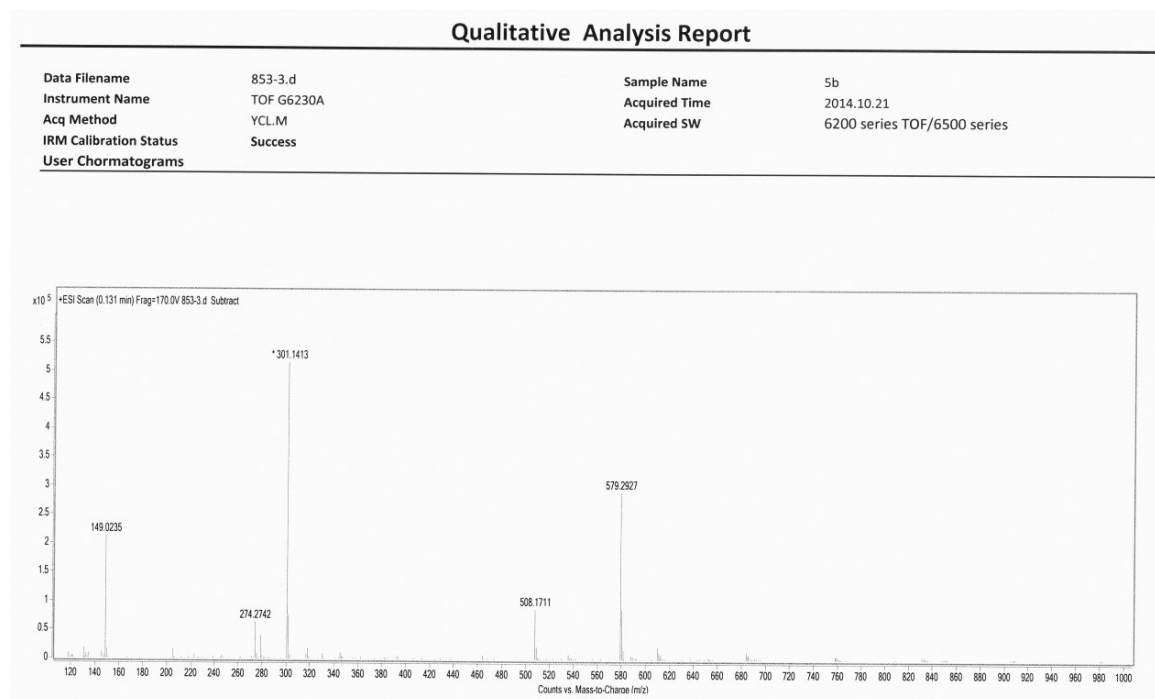

Figure S58. HRMS spectra of **5c**.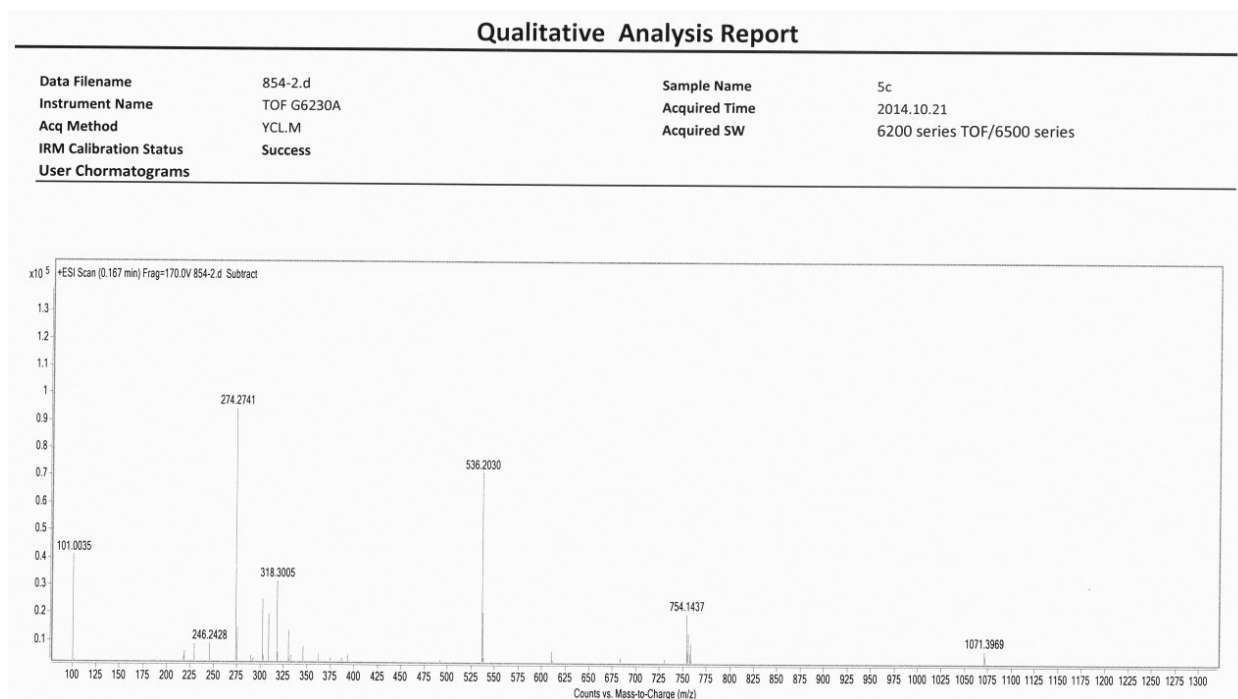Figure S59. HRMS spectra of **5d**.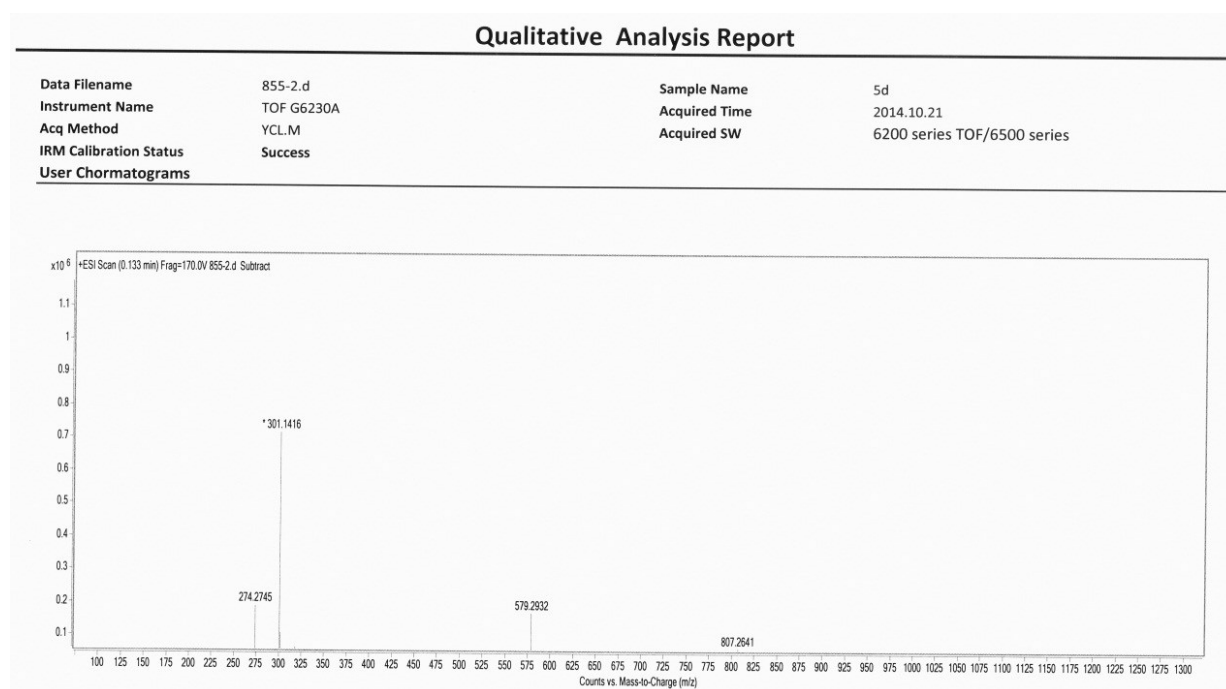

Figure S60. HRMS spectra of **5e**.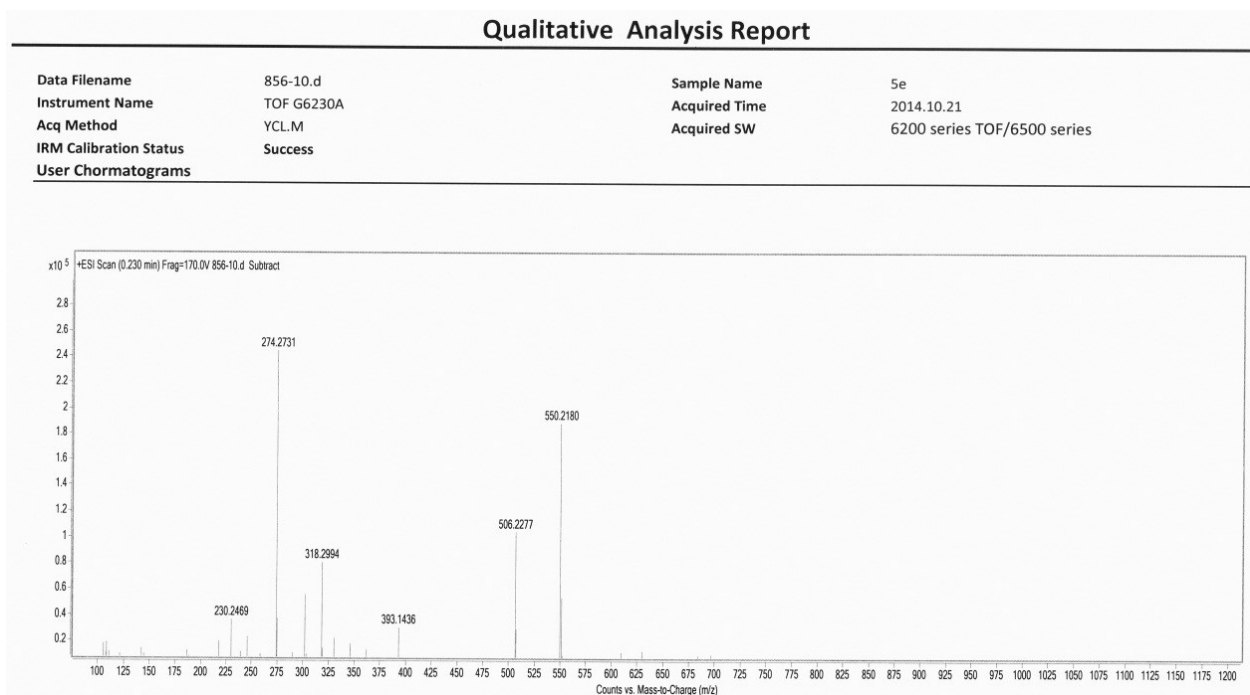Figure S61. HRMS spectra of **5f**.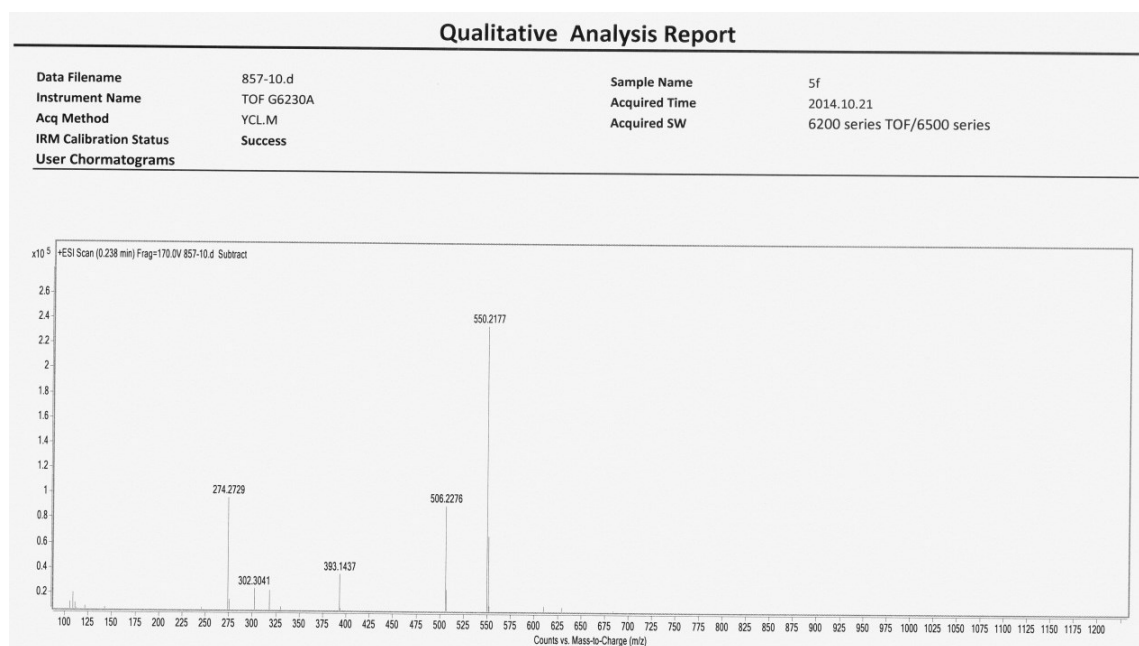

Figure S62. HRMS spectra of **5g**.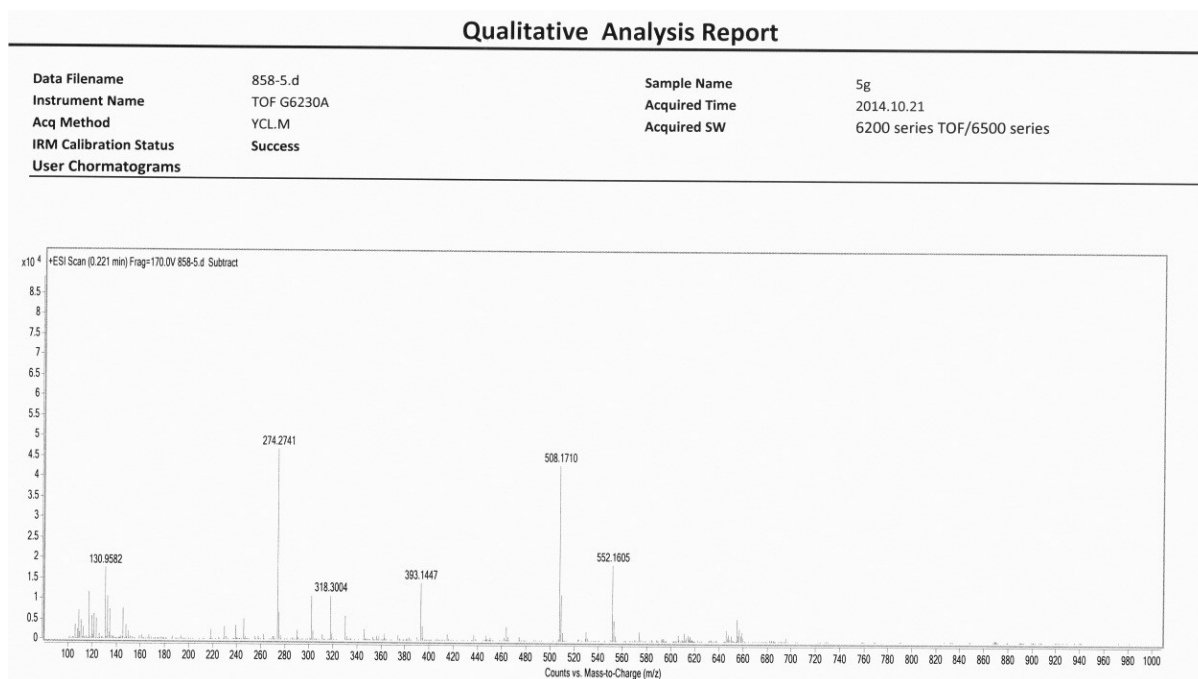Figure S63. HRMS spectra of **5h**.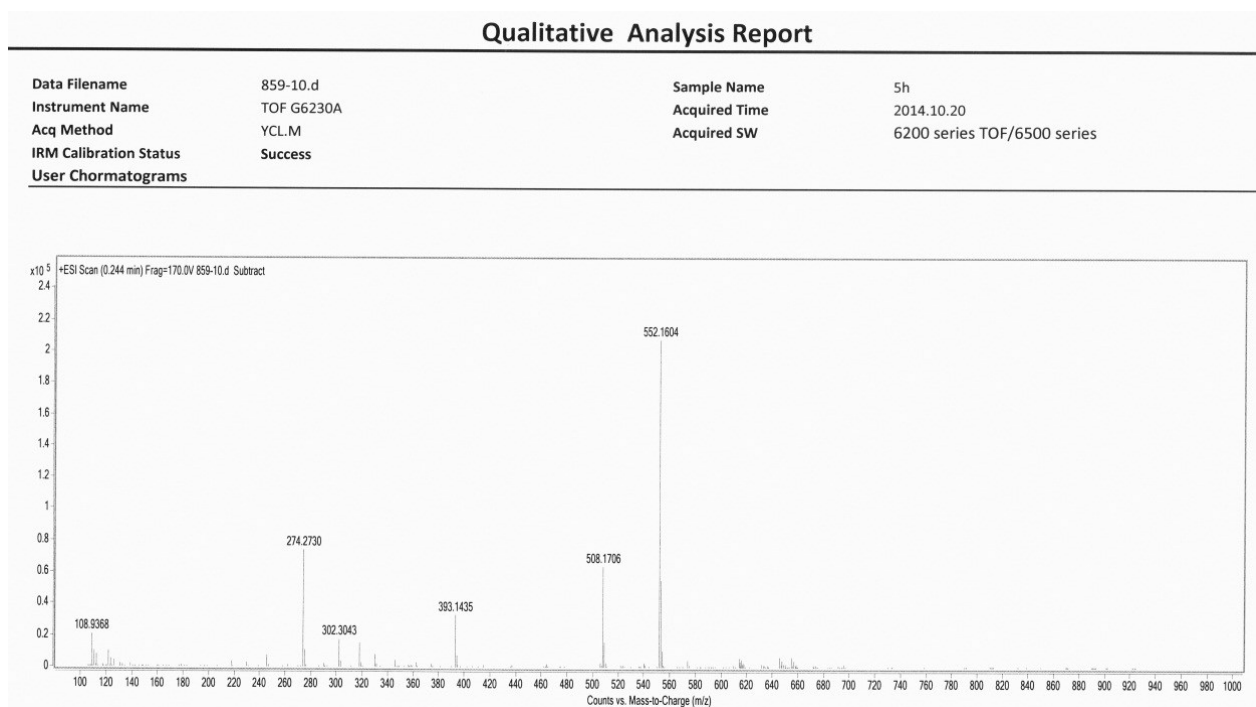



Figure S64. HRMS spectra of 7a.

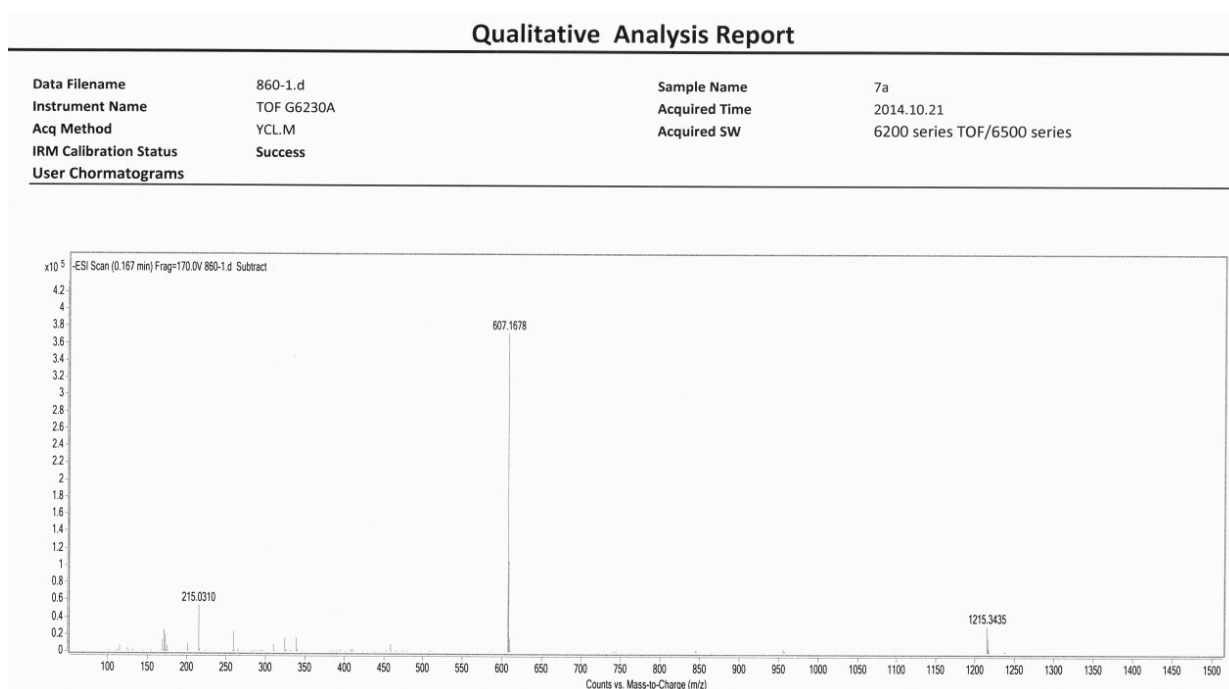

Figure S65. HRMS spectra of 7b.

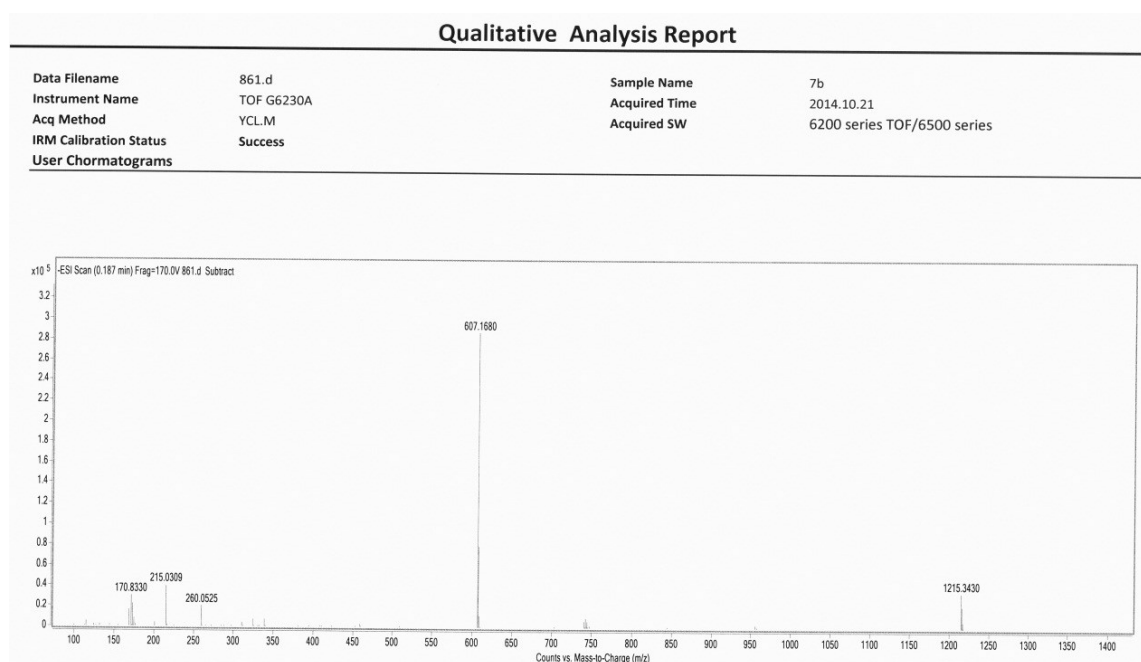

Figure S66. HRMS spectra of 7c.

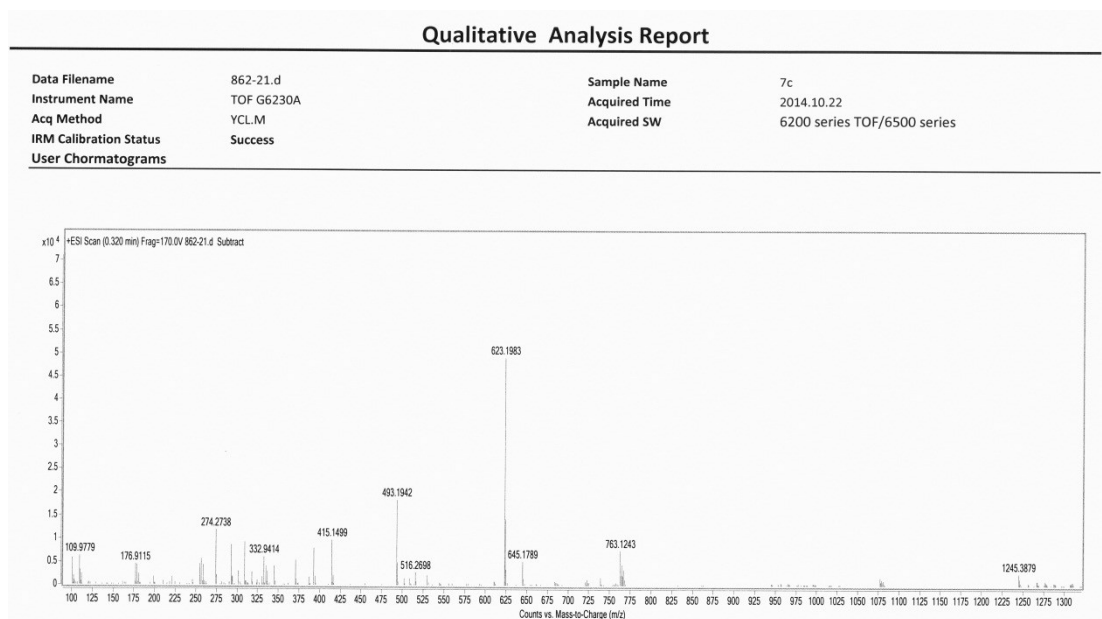

Figure S67. HRMS spectra of 7d.

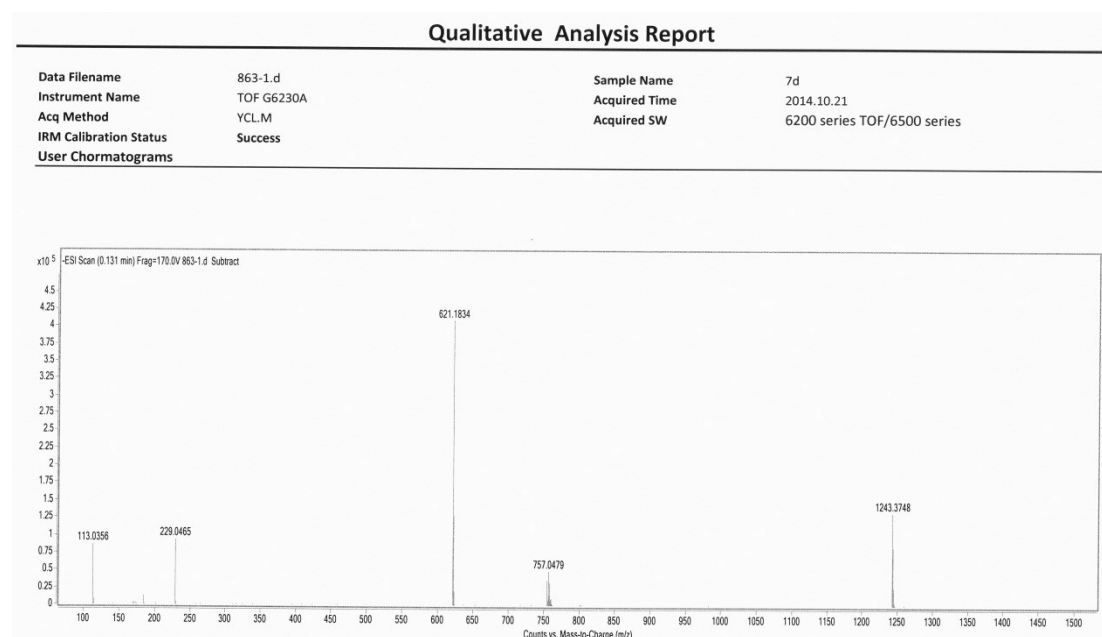

Figure S68. HRMS spectra of 7e.

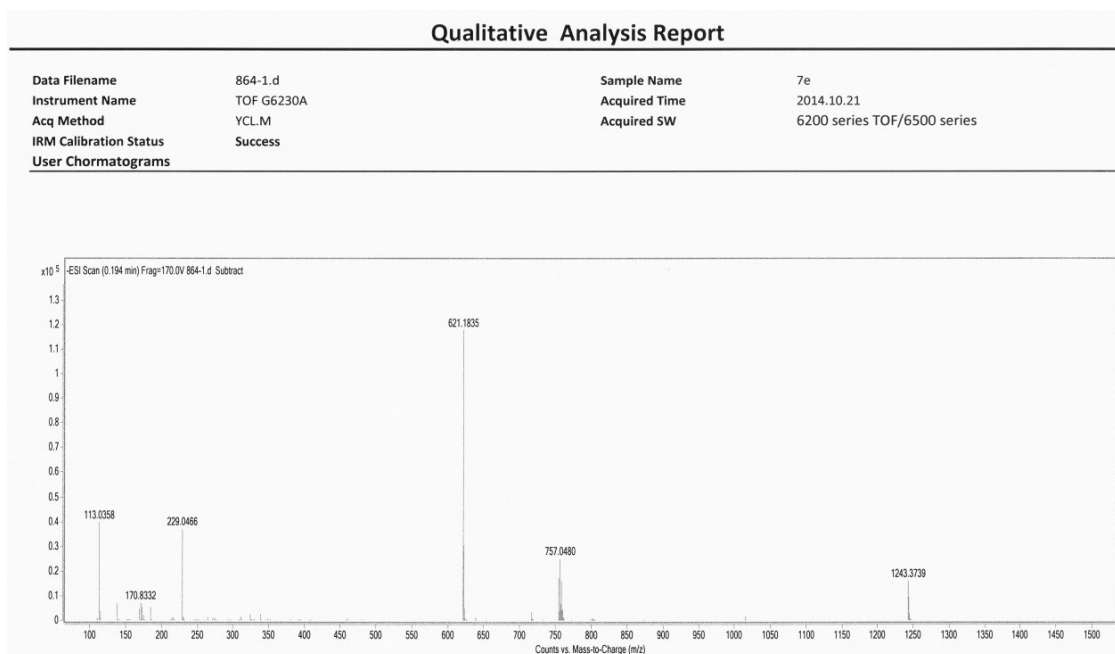

Figure S69. HRMS spectra of 7f.

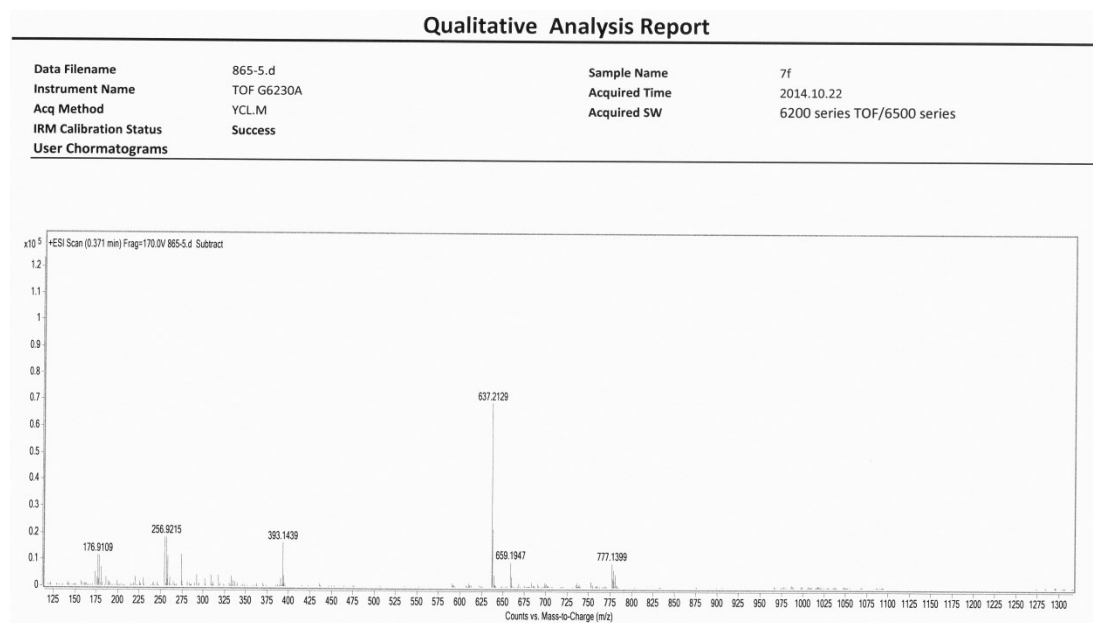

Supplement: s1 [file s1]
